# Supplementary material for: ‘I would never have done it if it hadn’t been digital’: a qualitative study on patients’ experiences of a digital management programme for hip and knee osteoarthritis in Sweden
Source: PubMed Central journal article supplement — BMJ Open. 2019 May 24;9(5):e028388. doi: 10.1136/bmjopen-2018-028388 (PMC6537991; doi:10.1136/bmjopen-2018-028388), 2019-05-24
Supplement: bmjopen-2018-028388.draft_revisions.pdf [file bmjopen-2018-028388.draft_revisions.pdf]

# BMJ Open

BMJ Open is committed to open peer review. As part of this commitment we make the peer review history of every article we publish publicly available.

When an article is published we post the peer reviewers' comments and the authors' responses online. We also post the versions of the paper that were used during peer review. These are the versions that the peer review comments apply to.

The versions of the paper that follow are the versions that were submitted during the peer review process. They are not the versions of record or the final published versions. They should not be cited or distributed as the published version of this manuscript.

BMJ Open is an open access journal and the full, final, typeset and author-corrected version of record of the manuscript is available on our site with no access controls, subscription charges or pay-per-view fees (<http://bmjopen.bmj.com>).

If you have any questions on BMJ Open's open peer review process please email [info.bmjopen@bmj.com](mailto:info.bmjopen@bmj.com)

# BMJ Open

**“I would never have done it if it hadn’t been digital”: A qualitative study on expectations and experiences of a digital management program for hip and knee osteoarthritis**

|                               |                                                                                                                                                                                                                                                                                                                                                                                                                                                                                                                                                                    |
|-------------------------------|--------------------------------------------------------------------------------------------------------------------------------------------------------------------------------------------------------------------------------------------------------------------------------------------------------------------------------------------------------------------------------------------------------------------------------------------------------------------------------------------------------------------------------------------------------------------|
| Journal:                      | <i>BMJ Open</i>                                                                                                                                                                                                                                                                                                                                                                                                                                                                                                                                                    |
| Manuscript ID                 | bmjopen-2018-028388                                                                                                                                                                                                                                                                                                                                                                                                                                                                                                                                                |
| Article Type:                 | Research                                                                                                                                                                                                                                                                                                                                                                                                                                                                                                                                                           |
| Date Submitted by the Author: | 06-Dec-2018                                                                                                                                                                                                                                                                                                                                                                                                                                                                                                                                                        |
| Complete List of Authors:     | Cronström, Anna; Lund University, Department of Clinical Sciences, Orthopedics, Lund University<br>Dahlberg , Leif ; Department of Clinical Sciences Lund, Orthopedics, Faculty of Medicine, Lund University; Clinical Epidemiology Unit<br>Nero, Håkan; Lunds Universitet, Department of Clinical Sciences Lund, Lund University<br>Ericson, Jennifer; Lund University, Department of Health Sciences<br>Hammarlund, Catharina Sjodahl; Lund University, Department of Health Sciences; Kristianstad University, The PRO-CARE Group, School of Health and Society |
| Keywords:                     | osteoarthritis, e-health, non-surgical management                                                                                                                                                                                                                                                                                                                                                                                                                                                                                                                  |
|                               |                                                                                                                                                                                                                                                                                                                                                                                                                                                                                                                                                                    |

SCHOLARONE™  
Manuscripts

1  
2  
3 **Original research article**  
4  
5  
6

7 **“I would never have done it if it hadn’t been digital”: A qualitative study on**  
8 **expectations and experiences of a digital management program for hip and**  
9 **knee osteoarthritis**  
10  
11

12 Anna Cronström<sup>1</sup>, Leif E Dahlberg<sup>1, 2</sup>, Håkan Nero<sup>1</sup>, Jennifer Ericson<sup>3</sup>, Catharina Sjö Dahl  
13 Hammarlund<sup>3,4</sup>,  
14  
15  
16

17  
18 <sup>1</sup>Orthopaedics, Department of Clinical Sciences Lund, Lund University, Lund, Sweden  
19

20  
21 <sup>2</sup>Skåne University Hospital, Lund, Sweden  
22

23 <sup>3</sup> Department of Health Sciences, Lund University, Lund, Sweden  
24

25  
26 <sup>4</sup> The PRO-CARE Group, School of Health and Society, Kristianstad University, Kristianstad,  
27  
28 Sweden  
29

30  
31  
32  
33 Correspondence to: Anna Cronström, Orthopaedics, Department of Clinical Sciences, Lund  
34  
35 University, Lund, Sweden. [anna.cronstrom@med.lu.se](mailto:anna.cronstrom@med.lu.se), +46707488770  
36  
37  
38  
39

40 **Keywords:** e-health; digital management; osteoarthritis  
41  
42  
43  
44  
45  
46  
47  
48  
49  
50  
51  
52  
53  
54  
55  
56  
57  
58  
59  
60

## ABSTRACT

### Objectives

To investigate the expectations and experiences of a digital management program for hip and knee OA, including education and exercises as well as asynchronous chat with an assigned physical therapist for feedback, questions and support.

### Setting

This study was conducted at a regional hospital in the southern part of Sweden.

### Methods

Nineteen patients (10 women), median age 66 (q1-q3, 57-71) years, with confirmed hip or knee OA were interviewed after completing their first six weeks in the program, using a semi-structured interview guide. The interviews were transcribed verbatim and were qualitatively analyzed using systematic text condensation.

### Results

Three categories emerged during the interviews:

1) *Management options for mitigating the consequences of OA*; 2) *Experiences of the design and exercises within the program* and 3) *Perceived effects of the digital program over time, and suggested improvements*. The participants had mostly positive experiences of the program. Particularly important for these experiences were no waiting list, the flexibility of taking part in the program with regards to location and time, and the possibility to have daily contact with a physical therapist. These aspects were also emphasized as advantages compared to traditional care.

## Conclusions

Digital management of OA, including education and exercise, was experienced as a valid alternative to traditional treatment in enabling the implementation of OA guidelines in a wider community. Easy access, exercising at one's own convenience, flexible options, daily follow-up and support by a physical therapist were mentioned as the most important features. In addition, the results will contribute to further development and improvement of digital OA management programs.

For peer review only

**Strengths and limitations of this study**

- Participants were purposefully selected, including both sexes, who differed in age, OA severity and physical function in order to have rich and varied data to being able to evaluate shared pattern across cases.
- The use of a systematic text condensation analysis method facilitated cross-case synthesis of text and meaning
- Conducting the interviews via telephone may have resulted in less depth of the interviews due to a loss of visual input

## BACKGROUND

Due to a combination of decreasing healthcare resources, long waiting lists, and limited options to meet the demands of the modern individual who often has a busy schedule, the use of web-based or digital management options in healthcare, so-called e-health, has increased significantly during the last decade [1-3]. Accessibility and flexibility, social motives and an option for anonymity and confidentiality are common arguments for choosing e-health [4-10].

Several digital management programs that incorporate web-based cognitive behavioral therapy have been developed for different conditions, such as anxiety [1], psoriasis [2, 11], and eating disorders [3], with promising results. A recent review also suggests that it may be easier to seek care and to incorporate the training into daily life when it is accompanied by the flexibility and anonymity that online delivery provides, and that some people even rated their relationship with the online-therapist higher than their relationship with their ordinary therapist [6]. However, web-based or digital management for musculoskeletal disorders have thus far not been studied to any great extent [14].

Individuals with osteoarthritis (OA) constitute one group of patients for whom e-health may be highly beneficial [4, 14]. As concluded previously in various literature, the guidelines for OA treatment (education, exercise and weight management) are not always implemented and few individuals with OA receive adequate management [4, 15, 16]. Lack of healthcare resources, living in rural areas, and having a lower level of education are all factors that may reduce the likelihood of receiving appropriate information on management options for OA

1  
2  
3 [4, 16]. Web-based or digital interventions for OA have been suggested as a way to make the  
4  
5 availability of guideline-based OA management accessible to a wider community [4, 14, 17]  
6  
7  
8 and a few studies have shown promising results of e-health interventions on pain and  
9  
10 physical function in patients with hip or knee OA [14, 17-20].  
11  
12  
13

14  
15  
16 Joint Academy [21], was developed in Sweden and is a digital version of the evidence-based  
17  
18 face-to-face self-management program *Better Management of Patients with OsteoArthritis*  
19  
20 (BOA) [15, 22]. The program comprises OA education (instructional videos on OA, physical  
21  
22 activity and weight management), individualized neuromuscular exercises with increasing  
23  
24 difficulty, and an option to chat asynchronously with an assigned physical therapist for  
25  
26 feedback and questions. Studies have shown that completing the introduction phase of six  
27  
28 weeks in this digital OA management program reduces pain and medication intake, increases  
29  
30 physical function and walking ability, as well as reduces the willingness for surgery [18, 19,  
31  
32 23]. However, patient experience of digital management for OA has not yet been evaluated.  
33  
34 This knowledge may help to further improve e-health as a management option for OA and to  
35  
36 facilitate the implementation of OA guidelines in a wider community. Thus, the aim of this  
37  
38 qualitative study was to investigate the expectations and experiences of a digital  
39  
40 management program in patients with hip or knee OA.  
41  
42  
43  
44  
45  
46  
47  
48  
49  
50

## 51 **METHOD**

### 52 **Setting and sampling**

53  
54 This study was conducted at a regional hospital in the southern part of Sweden. From a total  
55  
56 sample of 462 individuals that had completed six weeks in the digital OA management  
57  
58 program between 2015 and 2018, 73 invitations with written information about the study  
59  
60



1  
2  
3 were sent out by e-mail. The inclusion criterion was hip or knee OA, previously confirmed or  
4  
5 diagnosed by an orthopedic surgeon involved in the program and the exclusion criteria were  
6  
7  
8 i) reporting other joints than hip or knee as the primary joint for OA symptoms, and ii) not  
9  
10 understanding and/or speaking Swedish. The participants were purposefully selected in  
11  
12 order to represent both sexes, different age groups, perceived pain and physical function  
13  
14 [24]. Twenty-one participants accepted the invitation to participate in this study. Two were  
15  
16 excluded as one did not speak Swedish and one did not return our phone calls. Ten women  
17  
18 and nine men, median age 66 (q1-q3, 57-71) years were consecutively included in the study.  
19  
20 Their primary OA joint location was either in the knee (48%) or hip (52%). All participants in  
21  
22 this study completed the program via stationary computers, laptops or mobile phones. The  
23  
24 Regional Ethical Review Board in Lund, Sweden (Dnr 2017/651; Dnr 2017/980) approved the  
25  
26 study and all patients gave their written informed consent prior to participation.  
27  
28  
29  
30  
31  
32  
33  
34  
35

### 36 Data collection

37 The interviews were conducted by two of the authors (JE & AC), either as face-to-face  
38  
39 interviews, by Skype or by telephone, depending on the participant's location and access to  
40  
41 Skype. The semi-structured interview guide included areas of interest such as 1) experiences  
42  
43 of living with OA, 2) expectations of the management program before participating, 3)  
44  
45 experiences of the digital management program, and 4) experiences of factors that may  
46  
47 have increased their motivation, persistence and emotional reactions. In addition, the  
48  
49 participants were asked to suggest possible improvements to the program. Follow-up  
50  
51 questions were used to encourage the participants to elaborate on the subject and to  
52  
53 explain or clarify the meaning and consequences of their experiences. The interview guide  
54  
55 and follow-up questions were pilot tested and was then subjected to minor editing. The  
56  
57  
58  
59  
60

1  
2  
3 interviews, which lasted approximately 30-40 minutes, were recorded and transcribed  
4  
5 verbatim. The transcripts were analyzed using systematic text condensation (STC) according  
6  
7 to Malterud [25], which is based on Giorgi's phenomenological analysis [26]. STC was chosen  
8  
9 as the procedure facilitates cross-case synthesis of text and meaning [25]. Data collection  
10  
11 stopped when no further information was added. See Appendix 1 for interview guide.  
12  
13  
14  
15  
16  
17

### 18 **Data analysis**

19 First, the interview transcripts were read to get a general impression of the whole and to  
20  
21 identify primary themes. Then, meaning units were identified and formulated into codes  
22  
23 that represented the core of the statements. During this phase, three of the authors (JE, AC,  
24  
25 and CSH) worked individually to identify as many perspectives and perceptions as possible in  
26  
27 the material. Next, all authors worked together with the coded data to produce one set of  
28  
29 data, extracting duplicates and data that were not relevant for the aim of the study. The  
30  
31 coded data were then organized into subcategories, and the content of the meaning units of  
32  
33 each category was re-examined. The meaning and representation of the data was  
34  
35 formulated into aspects representing the content. Thereafter, the subcategories were  
36  
37 organized into categories. To validate the categories and make sure that no important  
38  
39 aspects had been overlooked, the clusters were referred back to the raw data, and read  
40  
41 through once again by the authors. Finally, the re-contextualized data was expressed as  
42  
43 interpretations of the meaning of each category and representative quotes were selected for  
44  
45 each category/subcategory.  
46  
47  
48  
49  
50  
51  
52  
53  
54  
55  
56

### 57 **RESULT**

58 Three categories were uncovered during the analysis:  
59  
60

1  
2  
3 1) Management options for mitigating the consequences of OA, with two sub-categories a)  
4  
5 Consequences of OA on everyday life and b) Expectations when joining the digital program.  
6  
7

8 2) Experiences of the design and exercises within the program, with four sub-categories a)  
9  
10 Easy to execute, b) Flexibility to choose when and where, c) The importance of interacting  
11  
12 with healthcare professionals and d) Other motivating factors. 3) Perceived effects of the  
13  
14 digital program over time, and suggested improvements, with three subcategories a)  
15  
16 Perceived effects of the program after the initial six weeks, b) Reasons for continuing to  
17  
18 participate in the program and c) Suggestions for improving the digital program.  
19  
20  
21  
22  
23  
24

### 25 **Management options for mitigating the consequences of OA**

26  
27 This category entailed the experiences of the perceived consequences of OA and the  
28  
29 desirous search for a cure that would reduce their symptoms. All participants  
30  
31 experienced severe pain and decreased physical function prior to joining the digital  
32  
33 program. They were eager to try any treatment hoping that the program could  
34  
35 reduce their symptoms and improve their quality of life.  
36  
37  
38  
39  
40  
41  
42

### 43 **Consequences of OA on everyday life**

44 The participants described symptoms such as pain, disrupted sleep, deteriorating ability to  
45  
46 walk, being immobile, and activity limitations. Pain was the main motivation for seeking  
47  
48 professional management. The participants also found that their decreased functioning was  
49  
50 not only affecting themselves, but was also a burden on their partners and family. They were  
51  
52 trying all sorts of ways to ease the pain and to regain motor function.  
53  
54  
55  
56  
57  
58  
59  
60

1  
2  
3 *"I felt that it was impossible to continue in this way as I was in such intense pain..."*  
4  
5

6 (I18)  
7  
8  
9

### 10 **Expectations when joining the digital program**

11 When joining the digital program, most participants expressed that they were expecting  
12  
13 improvements in terms of reduced OA symptoms, such as reduced pain, and improved  
14  
15 flexibility and function to better cope with their everyday life. Generally, they did not expect  
16  
17 to be fully cured, but were anticipating to get better, or at least, not worse. However, a few  
18  
19 participants expressed that they had none or little faith in the management program. They  
20  
21 explained that they had signed up mostly out of curiosity to see if this program may help  
22  
23 them, since all former management options had failed to reduce their symptoms.  
24  
25  
26  
27  
28  
29  
30  
31

32 *"The expectations that I had were to be more flexible and to reduce the pain.*

33  
34 *That was how I figured it could be."* (I18)  
35  
36  
37  
38

### 39 **Experiences of the design and exercises within the program**

40 In general, the participants' experiences of the program were positive. They found the  
41  
42 program very easy to execute, flexible, and motivational. The interaction with the physical  
43  
44 therapist was described as important for support and encouragement.  
45  
46  
47  
48  
49

### 50 **Easy to execute**

51 Most participants were satisfied with the set-up of the program. The program was perceived  
52  
53 as structured, educational, and very simple to execute. Other elements that facilitated  
54  
55 participation were instructional videos, email reminders, and that the exercises were  
56  
57 individually customized with increasing difficulty, but also quickly accomplished.  
58  
59  
60

1  
2  
3  
4 *"This is such a great set-up. Not only the exercises, it's really educational and you*  
5 *learn what osteoarthritis is really about."* (I13)  
6  
7  
8  
9

10  
11 *"I found it really easy to follow. It does not take long and it's really good to*  
12 *receive these reminders by email"* (I18)  
13  
14  
15  
16

17  
18 However, a few participants perceived some difficulties in understanding how the program  
19 worked. They found that the progression of the exercises was not clearly described or that it  
20 was difficult to understand specific words used in the videos.  
21  
22  
23  
24

25  
26  
27  
28 *"To me it was hard to follow in the beginning and it actually took some time*  
29 *before I understood it correctly. It took like a few weeks until I really got the*  
30 *system. And that was a pity I think."* (I8)  
31  
32  
33  
34  
35  
36  
37  
38

#### 39 *Flexibility to choose when and where*

40 All participants acknowledged the flexibility that was associated with this digital  
41 management program. The ability to execute the exercises at home, or at any place at any  
42 time, without any use of equipment was highly appreciated. The ability to control the time  
43 point for when to perform the exercises and not having to make a scheduled appointment at  
44 a specific location, were described as an advantage compared to traditional management,  
45 and were further expressed as time-saving and less stressful since participants did not have  
46 to take time off from work for OA management. One participant even expressed that she  
47 would never have completed such a program if it had not been digital.  
48  
49  
50  
51  
52  
53  
54  
55  
56  
57  
58  
59  
60

1  
2  
3 *“The flexibility, that I could decide on my own when to perform the exercises was*  
4 *really good. That I didn’t have any scheduled time point when I had to dress, go*  
5 *out, and at this exact time point meet a physical therapist. That I could decide on*  
6 *my own...” (I11)*  
7  
8  
9  
10  
11  
12

13  
14  
15 *“I don’t think this is bad at all, to have it on the internet like this. I would never*  
16 *have done it if it hadn’t been digital” (I17)*  
17  
18  
19  
20  
21

22  
23 Some participants described that there were long waiting lists for traditional OA  
24 management in primary care and that the digital program was, thus, a flexible alternative  
25 that they could start at once.  
26  
27  
28  
29

30  
31 *“Yes, it was also like, there was such a long waiting list for primary care. So I*  
32 *thought...this,...this I can start doing right away.” (I10)*  
33  
34  
35  
36  
37  
38

### 39 *The importance of interacting with healthcare professionals*

40 Receiving an OA diagnosis without any physical meeting was perceived as a bit awkward to  
41 some participants. Some concerns were revealed regarding the risk of missing serious  
42 diseases if the diagnosis was given by phone or internet.  
43  
44  
45  
46  
47  
48

49  
50 *“It’s somewhat hard to give a diagnosis over the phone. You can do it, but it’s*  
51 *more difficult and you can miss things... there could have been a tumor there...”*  
52  
53  
54  
55 (I14)  
56  
57  
58  
59  
60

1  
2  
3 The majority of the participants had a very positive experience of the interaction with their  
4  
5 online physical therapist. They described that they received fast responses to their  
6  
7 questions, as well as information and encouragement, and that they often received feedback  
8  
9 within a few hours. Some expressed that the engagement from their physical therapist was  
10  
11 valuable for support and encouragement, especially if they experienced pain during the  
12  
13 exercises. The daily contact with their physical therapist encouraged them to perform their  
14  
15 exercises every day, which was also perceived as an advantage compared to traditional care  
16  
17 management.  
18  
19  
20  
21  
22  
23  
24

25 *“I think it’s excellent to have daily contact. I think it’s outstanding. That puts*  
26  
27 *pressure on me to really do these exercises and to answer him [the physical*  
28  
29 *therapist] and to give him an opportunity to give feedback and information about*  
30  
31 *other things... You can’t go to a physical therapist every day, every day, every*  
32  
33 *day. That won’t work. They won’t have time for me, they have others to take care*  
34  
35 *of as well. “ (I12)*  
36  
37  
38  
39  
40  
41

42 In contrast, some participants experienced the contact with their online physical therapist to  
43  
44 be unsatisfactory or even non-existent. They described that it could take a week before they  
45  
46 received any response, that the questions were only partly answered, or that they received  
47  
48 no answer at all. Continuous follow-up with feedback and encouragement on their  
49  
50 performance in the program was also lacking.  
51  
52  
53  
54  
55

56 *“In the beginning they said that someone would get in touch with me on a*  
57  
58 *regular basis and things like that. But this hasn’t happened as I expected” (I9)*  
59  
60

### **Other motivating factors**

The daily email reminders were typically highlighted as a motivator since they ensured that participants did not forget about the exercises and pushed them to perform the activities every day. Improved OA symptoms, and the measurement feedback system provided by the program were other factors that were mentioned as contributing to the participants' motivation to perform the exercises.

*"It was there, popped up in my email box every day. OK, today I'll do this exercise...it was something that pushed me. That was good I think...I needed that." (I8)*

### **Perceived effects of the digital program over time and suggested improvements**

The majority of the participants reported improved functioning and reduced pain.

However, some people felt no improvements and that their symptoms were the same as before entering the program. Many continued to participate in the program after the initial six weeks to maintain the positive improvements. Although the participants were positive to the digital program, they suggested a broader variation of exercises as well as follow-ups by video calls.

### **Perceived effects of the digital program after the initial six weeks**

Several participants experienced significant reductions in OA symptoms after completing the program. Improvements commonly mentioned were reduced pain, increased flexibility, and improved walking abilities. In many cases the symptoms were still present but were



1  
2  
3 perceived to have improved significantly, leading to increased quality of life and less focus  
4  
5 on the disease. Many described that they had recommended the program to friends and  
6  
7 relatives suffering from hip or knee OA, since they were satisfied with the result and wished  
8  
9 that more people could undergo the same management program.  
10  
11  
12  
13  
14

15 *“It has helped me fantastically. I don’t think I could have walked the way I do*  
16  
17 *today if I hadn’t done this... I don’t think so... I think this program has had an*  
18  
19 *absolute crucial role in the fact that I can manage my everyday life as well as I*  
20  
21 *can now, even though I have quite big problems.” (I2)*  
22  
23  
24  
25  
26  
27  
28

29 Not all participants perceived that they had reduced symptoms or improvements after six  
30  
31 weeks in the program. Some described that their symptoms were still the same or had  
32  
33 initially improved, and then worsened with deteriorating physical function and increased  
34  
35 pain. However, several of these participants still believed in the set-up despite not  
36  
37 experiencing the results they wished for. This lack of positive results was attributed to a  
38  
39 belief that they entered the program too late, i.e., that the exercises might have helped if  
40  
41 they had started at an earlier stage of the disease, or that the exercises may have slowed  
42  
43  
44  
45  
46 down the disease progression.  
47  
48  
49

50 *“The sad thing is that even if I do these exercises, every day, every week, every*  
51  
52 *month, every year... nothing happens... I don’t get any better.” (I4)*  
53  
54  
55  
56  
57  
58  
59  
60

1  
2  
3 *"It felt really good in the beginning. The reason that it didn't help me is probably*  
4 *because I started too late."* (I12)  
5  
6  
7  
8  
9

#### 10 11 *Reasons for continuing to participate in the program*

12

13 Many continued to do their exercises after the six weeks evaluation. Perceived functional  
14 improvements and pain reduction as well as fear of the symptoms worsening were highly  
15 motivating factors for continuing to perform the exercises. Another reason was that it might  
16 help them to be well prepared for any upcoming surgery.  
17  
18  
19  
20  
21  
22

23  
24  
25  
26 *"I believe in these exercises. I believe that exercise is good for osteoarthritis. I am*  
27 *convinced. And I think... if I stop doing this... then this terrible pain will start*  
28 *again."* (I8)  
29  
30  
31  
32  
33  
34

35 On the other hand, reduced pain and scheduled surgery were described by some  
36 participants as reasons for not continuing the program.  
37  
38  
39  
40  
41  
42

43 *"The pain was generally reduced... and then I did not feel as motivated as before*  
44 *so I quit doing the exercises... yes I did. Generally, in physical therapy, it's hard to*  
45 *keep your motivation up if you don't have a lot of pain."* (I19)  
46  
47  
48  
49  
50  
51

52  
53 *"I have met with my orthopedist and I'm scheduled for surgery... I feel that the*  
54 *end of this problem is near. That's why I'm not performing the exercises as I*  
55 *should anymore."* (I18)  
56  
57  
58  
59  
60

### *Suggestions for improving the digital program*

The participants suggested a few possible improvements to the digital program. For example, many experienced that there were too few exercises with little variation, and the exercises were perceived as somewhat monotonous after a while, especially if the participants were highly active in the program, i.e., carried out exercises several days a week. It was suggested that varying and/or adding more exercises would increase motivation to perform them.

*“In the end it became a bit boring since there were so few movements... so I added some extra on my own... It was a bit boring to do the same thing every day.” (I14)*

Some participants that were not satisfied with the communication with the online physical therapist suggested improved patient-physical therapist interaction using increased feedback and encouragement. Another suggestion included follow-ups video calls or Skype to enhance feedback on the individual performance of specific exercises

*“You could send a video via internet and the physical therapist will then check that you have performed the exercise and performed it correctly and correct you if you have performed it incorrectly.” (I19)*

## DISCUSSION

We sought to investigate participant perspectives of a digital management program for hip and knee OA. The majority of the participants reported improvements after the initial six weeks, such as reduced pain, increased mobility, and a sense of improved quality of life. In general the participants found that the program was easy to execute. The flexibility of being able to perform the exercises anywhere and at any time point was highly appreciated. The daily contact with the physical therapist was considered very important and an advantage compared to traditional care and the participants felt that the support and encouragement they received was important to continue exercising.

Despite international guidelines [28], many patients with hip and knee OA do not receive appropriate treatment and information regarding OA management options [4, 15, 16]. Web-based or digital management programs have been proposed as an option for facilitating the implementation of non-surgical treatment as they have the potential to reach more individuals in need of OA treatment [4]. The participants in the current study were mostly positive to the set-up of the program. Being able to perform the exercises whenever and wherever they desired, without needing to take time off from work, was described as valuable. Several participants also mentioned that the digital program was something they could start doing right away instead of being put on a waiting list. They also experienced the program to be educational and they felt motivated by the daily email reminders and the feedback system that were provided by the program. This result is in line with previous studies investigating patient perceptions of digital OA management, e.g., through internet or tele rehabilitation, where the participants experienced such programs to be convenient and time-saving [29, 30].

1  
2  
3  
4  
5  
6 Exercise is one of the cornerstones of OA management [28]. However, the outcome of the  
7  
8 OA management program is highly dependent on adherence to the exercises, and people  
9  
10 with OA seem to be among those with particularly poor adherence to this type of treatment  
11  
12 [31]. A recent systematic review of people with hip and knee OA identified factors such as  
13  
14 increased knowledge of the disease and benefits of exercise, reduced symptoms, easy access  
15  
16 to training facilities, and the ability to fit the exercises into daily life as facilitating exercise  
17  
18 participation, whereas long travel time and parking difficulties were considered as barriers  
19  
20 [32]. The results from the current study indicate that a digital program may facilitate  
21  
22 participation in OA management programs and eliminate some of the barriers associated  
23  
24 with exercise participation, and further highlights the importance of adequate information  
25  
26 and education regarding the benefits of exercise and different treatment options in OA. In  
27  
28 addition, a digital delivery also enables the patients to continue their treatment week after  
29  
30 week to further improvements and to sustain their achieved behavioral change.  
31  
32  
33  
34  
35  
36  
37  
38  
39

40 Previous research indicates that support and encouragement from healthcare staff are  
41  
42 important factors in facilitating exercise participation in people with hip and knee OA [32].  
43  
44 This was also reflected in the current study. Interaction with the physical therapist was  
45  
46 another important aspect that was highlighted by the participants. Most participants had a  
47  
48 positive experience of the contact with their assigned physical therapist and they were  
49  
50 highly motivated by the daily contact and the support and encouragement that were  
51  
52 provided. This result further emphasizes previous findings that a strong therapeutic alliance  
53  
54 can be established without meeting in person [33-35]. However, some participants were not  
55  
56 satisfied with the contact, which in turn lowered their motivation to perform the exercises.  
57  
58  
59  
60

1  
2  
3 This may indicate that support and encouragement from the physical therapist are  
4 prerequisites for a satisfactory experience of a digital OA management program.  
5  
6  
7  
8  
9

10 In accordance with studies on tele rehabilitation, [29, 30], some concerns were expressed in  
11 our interviews about being diagnosed online. A few patients were afraid that they may have  
12 been suffering from a more serious disease, such as cancer, and that a differential diagnosis  
13 may be difficult via the internet. It is therefore important to respond to these worries  
14 accordingly, and provide the patients with information that explains that OA is primarily  
15 diagnosed by symptoms and signs without any use of radiography or laboratory equipment  
16 [36]. Also, some participants wished to have follow-ups via video call to eliminate the risk of  
17 performing the exercises incorrectly. This is consistent with previous studies reporting that  
18 non-supervised home-based exercises can give rise to concerns regarding the correct  
19 performance of the exercises [5, 30, 37]. Video calls may, thus, be one way to develop the  
20 program further and to optimize the experiences of digital programs without any physical  
21 meeting. However, the influence of video conversations need further study.  
22  
23  
24  
25  
26  
27  
28  
29  
30  
31  
32  
33  
34  
35  
36  
37  
38  
39  
40  
41

42 Many participants in this study reported improvements in symptoms and physical function,  
43 such as reduced pain and improved walking ability. Interestingly, reduced pain and being  
44 scheduled for surgery were two factors described as both facilitators and barriers to  
45 continuing in the program. Some participants continued to exercise because they  
46 experienced that the program had reduced their pain and they were afraid that the pain  
47 would come back if they stopped doing the exercises. In contrast, some felt that reduced  
48 pain was a reason to stop doing the exercises, as their motivation was lost when pain no  
49 longer was an issue. Likewise, some participants continued to exercise since they wanted to  
50  
51  
52  
53  
54  
55  
56  
57  
58  
59  
60

1  
2  
3 be ready and “as fit as possible” for a total joint replacement (TJR), whereas others quit  
4  
5 doing the exercises when they were scheduled for TJR as they believed the surgery would  
6  
7 solve their problems anyway. Pre-surgery exercise is known to improve outcomes such as  
8  
9 length of hospitalization, knee range of motion, and physical function after total knee  
10  
11 replacements [38] and such information is, therefore, important to include in the  
12  
13 educational material to facilitate recovery after any future TJRs in these patients.  
14  
15  
16

17  
18  
19 One strength of this study is that the participants were purposefully selected, including both  
20  
21 men and women who differed in age, OA severity, physical function, and OA location (hip or  
22  
23 knee) from different parts of Sweden. However, since the participants were located all over  
24  
25 Sweden, the interviews were mostly conducted by telephone or via Skype. This approach  
26  
27 may have resulted in less depth of the interviews due to a loss of visual input. Also, two of  
28  
29 the participants completed the program more than one year prior to the interviews, which  
30  
31 may have influenced their recollection of the program and thereby also the experiences  
32  
33 expressed during the interviews.  
34  
35  
36  
37  
38  
39  
40  
41

42 Throughout the data analysis reflexivity has been considered, i.e., we have been aware that  
43  
44 the pre-understanding that the authors may have as clinicians and researchers could affect  
45  
46 the data, if one is not fully aware of previous experiences [39]. All authors worked separately  
47  
48 during the data processing and there were continuous discussions during the analysis aimed  
49  
50 at eliminating possible influences of previous experiences, which helped us to stay neutral to  
51  
52 the data. In addition, we have also presented a signature after each quotation to show the  
53  
54 representation of our participants, and to add transparency and trustworthiness to our  
55  
56 findings and interpretations of the data.  
57  
58  
59  
60

## CONCLUSION

A digital management program for OA, including education and exercise as well as asynchronous chats with an assigned physical therapist for feedback, questions and engagement, may be an alternative to traditional treatment and further facilitate the implementation of OA guidelines in a wider community. The participants had mostly positive experiences of the program, the flexibility of the program with regards to location and time. Regular and frequent contact with a physical therapist was deemed particularly important for a positive experience of the program and was also emphasized as an advantage compared to traditional care. In addition, the result of this study will contribute to the further development and improvement of digital management for OA.

## AUTHORS' CONTRIBUTION

Anna Cronström, PhD contributed to the design of the study, conducted part of the interviews, was responsible for the analysis and interpretation of the data, and was in charge of writing the manuscript. Leif E Dahlberg, PhD contributed to the conception and design of the study, contributed to the interpretation of the data, and provided feedback on drafts of this paper. Håkan Nero, PhD contributed to the conception and design of the study, contributed to the analysis and interpretation of the data, and provided feedback on drafts of this paper. Jennifer Ericson, BSc student contributed to the conception and design of the study, conducted part of the interviews, contributed to the analysis and interpretation of the data, and provided feedback on drafts of this paper. Catharina Sjö Dahl Hammarlund, PhD contributed to the conception and design of the study, contributed to the analysis and interpretation of the data, and provided feedback on drafts of this paper. All authors have read and approved the final manuscript.



## FUNDING

This research was funded by Vinnova, Sweden's Innovation Agency, by Governmental Funding of Clinical Research within the National Health Service (ALF), the Faculty of Medicine, Lund University and by Region Skåne.

## COMPETING INTEREST

HN is a physical therapist and part-time consultant at the specific OA management program, which was used in the present study and LED is the co-founder and Chief Medical Officer in the corporation behind the same program. No other relationships or activities exist that could appear to have influenced the submitted work.

## DATA SHARING STATEMENT

The datasets used and/or analyzed during the current study are available from the corresponding author on reasonable request.

## PATIENT AND PUBLIC INVOLVEMENT STATEMENT

The Joint Academy treatment program for OA is based on the evidence-based BOA concept [15]. In addition to the interviews in the present study, the digital platform has previously been further developed and improved by analyzing questionnaires and opinions from patients recruited via the Swedish Rheumatism Association. These patients were able to test Joint Academy and were extensively interviewed about their opinions. All other aspects of this research were performed without patient involvement. Patients were not invited to comment on the study design and were not consulted to develop patient-relevant outcomes or interpret the results. Patients were not invited to contribute to the writing or editing of this document for readability or accuracy.

## EXCLUSIVE LICENSE STATEMENT

I, the Submitting Author has the right to grant and does grant on behalf of all authors of the Work (as defined in the below author licence), an exclusive licence and/or a non-exclusive licence for contributions from authors who are: i) UK Crown employees; ii) where BMJ has agreed a CC-BY licence shall apply, and/or iii) in accordance with the terms applicable for US Federal Government officers or employees acting as part of their official duties; on a worldwide, perpetual, irrevocable, royalty-free basis to BMJ Publishing Group Ltd (“BMJ”) its licensees and where the relevant Journal is co-owned by BMJ to the co-owners of the Journal, to publish the Work in BMJ Open and any other BMJ products and to exploit all rights, as set out in our licence.

The Submitting Author accepts and understands that any supply made under these terms is made by BMJ to the Submitting Author unless you are acting as an employee on behalf of your employer or a postgraduate student of an affiliated institution which is paying any applicable article publishing charge (“APC”) for Open Access articles. Where the Submitting Author wishes to make the Work available on an Open Access basis (and intends to pay the relevant APC), the terms of reuse of such Open Access shall be governed by a Creative Commons licence – details of these licences and which Creative Commons licence will apply to this Work are set out in our licence referred to above.

## REFERENCES

1. Olthuis JV, Watt MC, Bailey K, Hayden JA, Stewart SH: **Therapist-supported Internet cognitive behavioural therapy for anxiety disorders in adults.** *The Cochrane database of systematic reviews* 2016, **3**:Cd011565.
2. van Beugen S, Ferwerda M, Hoeve D, Rovers MM, Spillekom-van Koulil S, van Middendorp H, Evers AW: **Internet-based cognitive behavioral therapy for patients with chronic somatic conditions: a meta-analytic review.** *Journal of medical Internet research* 2014, **16**(3):e88.
3. Boogerd EA, Noordam C, Kremer JA, Prins JB, Verhaak CM: **Teaming up: feasibility of an online treatment environment for adolescents with type 1 diabetes.** *Pediatric diabetes* 2014, **15**(5):394-402.
4. Li LC, Cott C, Jones CA, Badley EM, Davis AM: **Improving Primary Health Care in Chronic Musculoskeletal Conditions through Digital Media: The PEOPLE Meeting.** *JMIR research protocols* 2013, **2**(1):e13.
5. Bjork AB, Sjoström M, Johansson EE, Samuelsson E, Umefjord G: **Women's experiences of internet-based or postal treatment for stress urinary incontinence.** *Qualitative health research* 2014, **24**(4):484-493.
6. Verhoeks C, Teunissen D, van der Stelt-Steenbergen A, Lagro-Janssen A: **Women's expectations and experiences regarding e-health treatment: A systematic review.** *Health informatics journal* 2017:1460458217720394.
7. Bidmon S, Terlutter R: **Gender Differences in Searching for Health Information on the Internet and the Virtual Patient-Physician Relationship in Germany: Exploratory Results on How Men and Women Differ and Why.** *Journal of medical Internet research* 2015, **17**(6):e156.
8. Powell J, Inglis N, Ronnie J, Large S: **The characteristics and motivations of online health information seekers: cross-sectional survey and qualitative interview study.** *Journal of medical Internet research* 2011, **13**(1):e20.
9. Sanchez-Ortiz VC, House J, Munro C, Treasure J, Startup H, Williams C, Schmidt U: **"A computer isn't gonna judge you": a qualitative study of users' views of an internet-based cognitive behavioural guided self-care treatment package for bulimia nervosa and related disorders.** *Eating and weight disorders : EWD* 2011, **16**(2):e93-e101.
10. Roettl J, Bidmon S, Terlutter R: **What Predicts Patients' Willingness to Undergo Online Treatment and Pay for Online Treatment? Results from a Web-Based Survey to Investigate the Changing Patient-Physician Relationship.** *Journal of medical Internet research* 2016, **18**(2):e32.
11. van Beugen S, Ferwerda M, Spillekom-van Koulil S, Smit JV, Zeeuwen-Franssen ME, Kroft EB, de Jong EM, Otero ME, Donders AR, van de Kerkhof PC *et al*: **Tailored Therapist-Guided Internet-Based Cognitive Behavioral Treatment for Psoriasis: A Randomized Controlled Trial.** *Psychotherapy and psychosomatics* 2016, **85**(5):297-307.
12. Venkatesh V, F D: **A Theoretical Extension of the Technology Acceptance Model: Four Longitudinal Field Studies.** *Management Science* 2000, **46**(2):169-332.
13. Venkatesh V, Morris M, Davis D, Davis F: **"User acceptance of information technology: Toward a unified view".** *MIS Quarterly* 2003, **27**(3):425-478.
14. Pietrzak E, Cotea C, Pullman S, Nasveld P: **Self-management and rehabilitation in osteoarthritis: is there a place for internet-based interventions?** *Telemedicine journal and e-health : the official journal of the American Telemedicine Association* 2013, **19**(10):800-805.
15. Thorstensson CA, Garellick G, Rystedt H, Dahlberg LE: **Better Management of Patients with Osteoarthritis: Development and Nationwide Implementation of an Evidence-Based Supported Osteoarthritis Self-Management Programme.** *Musculoskeletal care* 2015, **13**(2):67-75.

16. Li LC, Sayre EC, Kopec JA, Esdaile JM, Bar S, Cibere J: **Quality of nonpharmacological care in the community for people with knee and hip osteoarthritis.** *The Journal of rheumatology* 2011, **38**(10):2230-2237.
17. Bossen D, Veenhof C, Van Beek KE, Spreeuwenberg PM, Dekker J, De Bakker DH: **Effectiveness of a web-based physical activity intervention in patients with knee and/or hip osteoarthritis: randomized controlled trial.** *Journal of medical Internet research* 2013, **15**(11):e257.
18. Nero H, Dahlberg J, Dahlberg LE: **A 6-Week Web-Based Osteoarthritis Treatment Program: Observational Quasi-Experimental Study.** *Journal of medical Internet research* 2017, **19**(12):e422.
19. Dahlberg LE, Grahn D, Dahlberg JE, Thorstensson CA: **A Web-Based Platform for Patients With Osteoarthritis of the Hip and Knee: A Pilot Study.** *JMIR research protocols* 2016, **5**(2):e115.
20. Smittenaar P, Erhart-Hledik JC, Kinsella R, Hunter S, Mecklenburg G, Perez D: **Translating Comprehensive Conservative Care for Chronic Knee Pain Into a Digital Care Pathway: 12-Week and 6-Month Outcomes for the Hinge Health Program.** *JMIR rehabilitation and assistive technologies* 2017, **4**(1):e4.
21. **Joint Academy** [<https://www.jointacademy.com/se/en/>]
22. Jonsson T, Ekvall Hansson E, Thorstensson CA, Eek F, Bergman P, Dahlberg LE: **The effect of education and supervised exercise on physical activity, pain, quality of life and self-efficacy - an intervention study with a reference group.** *BMC musculoskeletal disorders* 2018, **19**(1):198.
23. Cronstrom A, Nero H, Dahlberg LE: **Factors associated with patients' willingness to consider joint surgery after completion of a digital osteoarthritis treatment program: A prospective cohort study.** *Arthritis care & research* 2018.
24. Patton M: **Qualitative evaluation and research methods**, 3rd edn. Thousand Oaks, CA: Sage Publications, Inc; 2002.
25. Malterud K: **Systematic text condensation: a strategy for qualitative analysis.** *Scandinavian journal of public health* 2012, **40**(8):795-805.
26. Giorgi A: **Phenomenology and psychological research.** Pittsburgh, PA: Duquesne University Press; 1985.
27. Loew L, Brosseau L, Kenny GP, Durand-Bush N, Poitras S, De Angelis G, Wells GA: **Factors influencing adherence among older people with osteoarthritis.** *Clinical rheumatology* 2016, **35**(9):2283-2291.
28. Jevsevar DS: **Treatment of osteoarthritis of the knee: evidence-based guideline, 2nd edition.** *The Journal of the American Academy of Orthopaedic Surgeons* 2013, **21**(9):571-576.
29. Lawford BJ, Bennell KL, Hinman RS: **Consumer Perceptions of and Willingness to Use Remotely Delivered Service Models For Exercise Management of Knee and Hip Osteoarthritis: A Cross-Sectional Survey.** *Arthritis care & research* 2017, **69**(5):667-676.
30. Lawford BJ, Delany C, Bennell KL, Hinman RS: **"I was really sceptical...But it worked really well": a qualitative study of patient perceptions of telephone-delivered exercise therapy by physiotherapists for people with knee osteoarthritis.** *Osteoarthritis and cartilage / OARS, Osteoarthritis Research Society* 2018, **26**(6):741-750.
31. Pisters MF, Veenhof C, Schellevis FG, Twisk JW, Dekker J, De Bakker DH: **Exercise adherence improving long-term patient outcome in patients with osteoarthritis of the hip and/or knee.** *Arthritis care & research* 2010, **62**(8):1087-1094.
32. Dobson F, Bennell KL, French SD, Nicolson PJ, Klaasman RN, Holden MA, Atkins L, Hinman RS: **Barriers and Facilitators to Exercise Participation in People with Hip and/or Knee Osteoarthritis: Synthesis of the Literature Using Behavior Change Theory.** *American journal of physical medicine & rehabilitation* 2016, **95**(5):372-389.
33. Lingely-Pottie P, McGrath PJ: **A therapeutic alliance can exist without face-to-face contact.** *Journal of telemedicine and telecare* 2006, **12**(8):396-399.

- 1  
2  
3 34. Knaevelsrud C, Maercker A: **Internet-based treatment for PTSD reduces distress and facilitates the development of a strong therapeutic alliance: a randomized controlled clinical trial.** *BMC psychiatry* 2007, **7**:13.
- 4  
5  
6 35. Muller I, Kirby S, Yardley L: **The therapeutic relationship in telephone-delivered support for people undertaking rehabilitation: a mixed-methods interaction analysis.** *Disabil Rehabil* 2015, **37**(12):1060-1065.
- 7  
8  
9 36. Abhishek A, Doherty M: **Diagnosis and clinical presentation of osteoarthritis.** *Rheumatic diseases clinics of North America* 2013, **39**(1):45-66.
- 10  
11 37. Cranen K, Drossaert CH, Brinkman ES, Braakman-Jansen AL, Ijzerman MJ, Vollenbroek-Hutten MM: **An exploration of chronic pain patients' perceptions of home telerehabilitation services.** *Health expectations : an international journal of public participation in health care and health policy* 2012, **15**(4):339-350.
- 12  
13  
14  
15  
16 38. Chen H, Li S, Ruan T, Liu L, Fang L: **Is it necessary to perform prehabilitation exercise for patients undergoing total knee arthroplasty: meta-analysis of randomized controlled trials.** *The Physician and sportsmedicine* 2018, **46**(1):36-43.
- 17  
18  
19  
20 39. Malterud K: **Qualitative research: standards, challenges, and guidelines.** *Lancet (London, England)* 2001, **358**(9280):483-488.
- 21  
22  
23  
24  
25  
26  
27  
28  
29  
30  
31  
32  
33  
34  
35  
36  
37  
38  
39  
40  
41  
42  
43  
44  
45  
46  
47  
48  
49  
50  
51  
52  
53  
54  
55  
56  
57  
58  
59  
60

1  
2  
3 **Interview guide - Experiences of a digital management program for hip and knee**  
4 **osteoarthritis** (translated from the Swedish version)  
5  
6  
7

8 How long have you had symptoms from your hip/knee?  
9

10 Could you describe your symptoms before joining the program?  
11

- 12
- 13 • How did your symptoms affect you everyday life?

14 What were your reasons for joining the program?  
15

16 What were your expectations before joining the program?  
17

18 How did you experience the treatment?  
19

- 20
- 21 • Set-up
  - 22 • Exercises
  - 23 • Availability
  - 24 • Layout
- 25

26 How was your motivation for doing the activities?  
27

28 How did you experience your contact with the physical therapist?  
29

30 Do you experience that the treatment has altered your symptoms?  
31

- 32
- 33 • In what way/direction?

34 Have you continued with the program/home exercises after the initial six weeks?  
35

- 36
- 37 • What were your reasons/motivations for continue/not continue?
- 38

39 How do you think Joint Academy could have done a better job in assisting your treatment?  
40  
41  
42  
43

44 At the end of the interview asking the participant to raise any subject not yet covered  
45

46 Throughout the interview the participants were asked to elaborate on the subject and to  
47 explain or clarify the meaning and consequences of their experiences  
48  
49  
50  
51  
52  
53  
54  
55  
56  
57  
58  
59  
60

## COREQ (CONsolidated criteria for REporting Qualitative research) Checklist

A checklist of items that should be included in reports of qualitative research. You must report the page number in your manuscript where you consider each of the items listed in this checklist. If you have not included this information, either revise your manuscript accordingly before submitting or note N/A.

| Topic                                          | Item No. | Guide Questions/Description                                                                                                                                   | Reported on Page No. |
|------------------------------------------------|----------|---------------------------------------------------------------------------------------------------------------------------------------------------------------|----------------------|
| <b>Domain 1: Research team and reflexivity</b> |          |                                                                                                                                                               | NA                   |
| <i>Personal characteristics</i>                |          |                                                                                                                                                               |                      |
| Interviewer/facilitator                        | 1        | JE & AC                                                                                                                                                       | 7 & 22               |
| Credentials                                    | 2        | JE:BSc student, AC: PhD                                                                                                                                       | 22                   |
| Occupation                                     | 3        | JE:Physiotherapy student, AC: Researcher                                                                                                                      | 22                   |
| Gender                                         | 4        | JE & AC: Female                                                                                                                                               |                      |
| Experience and training                        | 5        | Basic training                                                                                                                                                | 7                    |
| <i>Relationship with participants</i>          |          |                                                                                                                                                               |                      |
| Relationship established                       | 6        | No relationship                                                                                                                                               | NA                   |
| Participant knowledge of the interviewer       | 7        | All participants had oral and written information which included that the data collection was part of her Bachelor thesis and future scientific publications. | 6-7                  |
| Interviewer characteristics                    | 8        | JE & AC showed interest and empathy and gave relevant follow-up questions to encourage the participants to elaborate on their narratives.                     |                      |
| <b>Domain 2: Study design</b>                  |          |                                                                                                                                                               |                      |
| <i>Theoretical framework</i>                   |          |                                                                                                                                                               |                      |
| Methodological orientation and Theory          | 9        | Systematic text condensation as described by Malterud, which is based on Giorgis' psychological phenomenological analysis (ref 21,22)                         | 8                    |
| <i>Participant selection</i>                   |          |                                                                                                                                                               |                      |
| Sampling                                       | 10       | The participants were purposefully selected .....different age groups, perceived pain and physical function They were consecutively included...               | 6-7                  |
| Method of approach                             | 11       | Seventy three invitations with written information about the study were sent out by e-mail. Twenty-one accepted the invitation.                               | 6                    |
| Sample size                                    | 12       | Nineteen participated...                                                                                                                                      | 7                    |
| Non-participation                              | 13       | Two were excluded. One did not speak Swedish, one could not be reached.                                                                                       | 7                    |
| <i>Setting</i>                                 |          |                                                                                                                                                               |                      |
| Setting of data collection                     | 14       | Mostly in their homes using Skype or telephone, two personal interviews                                                                                       | 7                    |
| Presence of non-participants                   | 15       | None else were present besides the participants and researchers.                                                                                              | NA                   |
| Description of sample                          | 16       | Ten women and nine men, median age 66 (q1-q3, 57-71) years, OA joint location was either in the knee (48%) or hip (52%).                                      | 7                    |
| <i>Data collection</i>                         |          |                                                                                                                                                               |                      |
| Interview guide                                | 17       | The interview guide and follow-up questions were pilot tested and were then subjected to minor editing.                                                       | 7                    |
| Repeat interviews                              | 18       | No repeat interviews were carried out                                                                                                                         | NA                   |
| Audio/visual recording                         | 19       | The interviews were recorded.                                                                                                                                 | 8                    |
| Field notes                                    | 20       | Field notes was taken with regard to emotinal reactions and so on.                                                                                            |                      |
| Duration                                       | 21       | The duration was approximately 30-40 minutes.                                                                                                                 | 8                    |
| Data saturation                                | 22       | Data collection stopped when no further information was added.                                                                                                | 8                    |
| Transcripts returned                           | 23       | The transcripts were not returned to participants for comment and/or                                                                                          | NA                   |

| Topic                                  | Item No. | Guide Questions/Description                                                                                         | Reported on Page No. |
|----------------------------------------|----------|---------------------------------------------------------------------------------------------------------------------|----------------------|
|                                        |          | correction.                                                                                                         |                      |
| <b>Domain 3: analysis and findings</b> |          |                                                                                                                     |                      |
| <i>Data analysis</i>                   |          |                                                                                                                     |                      |
| Number of data coders                  | 24       | Three authors coded the data (JE,AC,CSH)                                                                            | 8                    |
| Description of the coding tree         | 25       | The coding tree was not provided.                                                                                   | NA                   |
| Derivation of themes                   | 26       | The themes derived from the data.                                                                                   | 8                    |
| Software                               | 27       | No software was used to manage the data.                                                                            | NA                   |
| Participant checking                   | 28       | The participants did not provide feedback on the findings.                                                          | NA                   |
| <i>Reporting</i>                       |          |                                                                                                                     |                      |
| Quotations presented                   | 29       | Participant quotations was presented to illustrate the findings and each quotation was identified with a signature. | 21                   |
| Data and findings consistent           | 30       | The data was rich, varied and consistent. No triangulation was done.                                                | 21                   |
| Clarity of major themes                | 31       | Major themes were clearly presented in the findings.                                                                | 8-17                 |
| Clarity of minor themes                | 32       | There is a description of diverse cases and discussion of minor themes.                                             | 18-21                |

Developed from: Tong A, Sainsbury P, Craig J. Consolidated criteria for reporting qualitative research (COREQ): a 32-item checklist for interviews and focus groups. *International Journal for Quality in Health Care*. 2007. Volume 19, Number 6: pp. 349 – 357

**Once you have completed this checklist, please save a copy and upload it as part of your submission. DO NOT include this checklist as part of the main manuscript document. It must be uploaded as a separate file.**



# BMJ Open

**I would never have done it if it hadn't been digital": A qualitative study on patients' experiences of a digital management program for hip and knee osteoarthritis in Sweden**

|                                 |                                                                                                                                                                                                                                                                                                                                                                                                                                                                                                                                                                     |
|---------------------------------|---------------------------------------------------------------------------------------------------------------------------------------------------------------------------------------------------------------------------------------------------------------------------------------------------------------------------------------------------------------------------------------------------------------------------------------------------------------------------------------------------------------------------------------------------------------------|
| Journal:                        | <i>BMJ Open</i>                                                                                                                                                                                                                                                                                                                                                                                                                                                                                                                                                     |
| Manuscript ID                   | bmjopen-2018-028388.R1                                                                                                                                                                                                                                                                                                                                                                                                                                                                                                                                              |
| Article Type:                   | Research                                                                                                                                                                                                                                                                                                                                                                                                                                                                                                                                                            |
| Date Submitted by the Author:   | 13-Mar-2019                                                                                                                                                                                                                                                                                                                                                                                                                                                                                                                                                         |
| Complete List of Authors:       | Cronström, Anna; Lund University, Department of Clinical Sciences, Orthopedics, Lund University<br>Dahlberg , Leif ; Department of Clinical Sciences Lund, Orthopedics, Faculty of Medicine, Lund University; Clinical Epidemiology Unit<br>Nero, Håkan; Lunds Universitet, Department of Clinical Sciences Lund, Lund University<br>Ericson, Jennifer; Lund University, Department of Health Sciences<br>Hammarlund, Catharina Sjö Dahl; Lund University, Department of Health Sciences; Kristianstad University, The PRO-CARE Group, School of Health and Society |
| <b>Primary Subject Heading</b>: | Rehabilitation medicine                                                                                                                                                                                                                                                                                                                                                                                                                                                                                                                                             |
| Secondary Subject Heading:      | Rehabilitation medicine                                                                                                                                                                                                                                                                                                                                                                                                                                                                                                                                             |
| Keywords:                       | osteoarthritis, e-health, non-surgical management                                                                                                                                                                                                                                                                                                                                                                                                                                                                                                                   |
|                                 |                                                                                                                                                                                                                                                                                                                                                                                                                                                                                                                                                                     |

SCHOLARONE™  
Manuscripts

1  
2  
3 1 **Original research article**  
4

5 2

6  
7 3 **“I would never have done it if it hadn’t been digital”: A qualitative study on**  
8 **patients’ experiences of a digital management program for hip and knee**  
9 **osteoarthritis in Sweden**  
10  
11 5

12  
13 6 Anna Cronström<sup>1</sup>, Leif E Dahlberg<sup>1, 2</sup>, Håkan Nero<sup>1</sup>, Jennifer Ericson<sup>3</sup>, Catharina Sjö Dahl  
14 7 Hammarlund<sup>3,4</sup>,  
15

16 8

17  
18 9 <sup>1</sup>Orthopaedics, Department of Clinical Sciences Lund, Lund University, Lund, Sweden  
19

20  
21 10 <sup>2</sup>Skåne University Hospital, Lund, Sweden  
22

23 11 <sup>3</sup> Department of Health Sciences, Lund University, Lund, Sweden  
24

25  
26 12 <sup>4</sup> The PRO-CARE Group, School of Health and Society, Kristianstad University, Kristianstad,  
27  
28 13 Sweden  
29

30 14

31  
32  
33 15 Correspondence to: Anna Cronström, Orthopaedics, Department of Clinical Sciences, Lund  
34

35 16 University, Lund, Sweden. [anna.cronstrom@med.lu.se](mailto:anna.cronstrom@med.lu.se), +46707488770  
36  
37

38 17

39  
40 18 **Keywords:** e-health; digital management; osteoarthritis  
41  
42  
43  
44  
45  
46  
47  
48  
49  
50  
51  
52  
53  
54  
55  
56  
57  
58  
59  
60

## 19 ABSTRACT

### 20 Objectives

21 To investigate the experiences of a digital management program for hip and knee  
22 osteoarthritis (OA), including education and exercises as well as asynchronous chat with an  
23 assigned physical therapist for feedback, questions and support.

### 24 Setting

25 This study was conducted at a regional hospital in the southern part of Sweden.

### 27 Methods

28 Nineteen patients (10 women), median age 66 (q1-q3, 57-71) years, with confirmed hip or  
29 knee OA were interviewed after completing their first six weeks in the program, using a  
30 semi-structured interview guide. The interviews were transcribed verbatim and were  
31 qualitatively analyzed using systematic text condensation.

### 33 Results

34 Three categories emerged during the interviews:

35 1) *Management options for mitigating the consequences of OA*; 2) *Experiences of the digital*  
36 *program* and 3) *Perceived effects of the digital program over time*. The participants had  
37 mostly positive experiences of the program. Particularly important for these experiences  
38 were no waiting list, the flexibility of taking part in the program with regards to location and  
39 time, and the possibility to have daily contact with a physical therapist. These aspects were  
40 also emphasized as advantages compared to traditional care.

### 42 Conclusions

43 Digital management of OA, including education and exercise, was experienced as a valid  
44 alternative to traditional treatment in enabling the implementation of OA guidelines in a

1  
2  
3  
4  
5  
6  
7  
8  
9  
10  
11  
12  
13  
14  
15  
16  
17  
18  
19  
20  
21  
22  
23  
24  
25  
26  
27  
28  
29  
30  
31  
32  
33  
34  
35  
36  
37  
38  
39  
40  
41  
42  
43  
44  
45  
46  
47  
48  
49  
50  
51  
52  
53  
54  
55  
56  
57  
58  
59  
60

45 wider community. Easy access, exercising at one’s own convenience, flexible options, daily  
46 follow-up and support by a physical therapist were mentioned as the most important  
47 features. In addition, the results will contribute to further development and improvement of  
48 digital OA management programs.

For peer review only

52

**Strengths and limitations of this study**

- Participants were purposefully selected, including both sexes, who differed in age, osteoarthritis severity and physical function in order to have rich and varied data, when synthesizing shared patterns across cases
- The use of a systematic text condensation analysis method facilitated cross-case synthesis of text and meaning
- Conducting the interviews via telephone may have resulted in less depth of the interviews due to a loss of visual input, but also allowed inclusion of participants from a wide geographic area.

## 53 BACKGROUND

54 Due to a combination of decreasing healthcare resources, long waiting lists, and difficulty to  
55 meet the demands of the modern individual who often has a busy schedule, the use of web-  
56 based or digital management options in healthcare, has increased significantly during the  
57 last decade [1-3]. Accessibility and flexibility, social motives and an option for anonymity and  
58 confidentiality are common arguments for choosing digital options [4-10]. A recent review  
59 also suggests that it may be easier to seek care and to incorporate the training into daily life  
60 when it is accompanied by the flexibility and anonymity that online delivery provides, and  
61 that some people even rated their relationship with the online-therapist higher than their  
62 relationship with their ordinary therapist [6]. However, web-based or digital management  
63 for musculoskeletal disorders have thus far not been studied to any great extent [11].

64  
65 Individuals with osteoarthritis (OA) constitute one group of patients for whom digital  
66 management may be highly beneficial [4, 11]. As concluded previously in various literature,  
67 the guidelines for OA treatment (education, exercise and weight management)[12] are not  
68 always implemented and few individuals with OA receive adequate management [4, 13, 14].  
69 Lack of healthcare resources, living in rural areas, and having a lower level of education are  
70 all factors that may reduce the likelihood of receiving appropriate information on  
71 management options for OA [4, 14]. Web-based or digital interventions for OA have been  
72 suggested as a way to make the availability of guideline-based OA management accessible to  
73 a wider community [4, 11, 15]. Unlike in patients with inflammatory arthritis where digital  
74 management does not seem to increase physical activity or quality of life [16], a few studies

1  
2  
3 75 have shown promising results of digital interventions on physical activity [17], pain and  
4  
5  
6 76 physical function in patients with hip or knee OA [11, 15, 18-20].  
7  
8  
9 77  
10  
11  
12 78 Joint Academy [19, 21, 22], was developed in Sweden and is a digital version of the evidence-  
13  
14 79 based face-to-face self-management program *Better Management of Patients with*  
15  
16 80 *OsteoArthritis* (BOA) [13, 23]. The program, as thoroughly described previously [19],  
17  
18 81 comprises OA education (instructional videos on OA, physical activity and weight  
19  
20 82 management), individualized neuromuscular exercises with increasing difficulty aiming at  
21  
22 83 improving lower extremity strength and neuromuscular control, and an option to chat  
23  
24 84 asynchronously with an assigned physical therapist for feedback and questions. Studies have  
25  
26 85 shown that completing the introduction phase of six weeks in this digital OA management  
27  
28 86 program reduces pain and medication intake, increases physical function and walking ability,  
29  
30 87 as well as reduces the willingness for surgery [18, 19, 24]. However, patient experience of  
31  
32 88 digital management for OA has not yet been evaluated. This knowledge may help to further  
33  
34 89 improve digital management options for OA and to facilitate the implementation of OA  
35  
36 90 guidelines in a wider community. Thus, the aim of this qualitative study was to investigate  
37  
38 91 the patients' experiences of using a digital management program for hip and knee OA.  
39  
40  
41  
42  
43  
44  
45  
46  
47  
48

## 93 **METHOD**

### 94 **Patient and public involvement statement**

95 The Joint Academy treatment program for OA is based on the evidence-based BOA concept  
96 [13]. In addition to the interviews in the present study, the digital platform has previously  
97 been further developed and improved by analyzing questionnaires and opinions from  
98 patients recruited via the Swedish Rheumatism Association. These patients were able to test

1  
2  
3 99 Joint Academy and were extensively interviewed about their opinions. All other aspects of  
4  
5  
6 100 this research were performed without patient involvement. Patients were not invited to  
7  
8 101 comment on the study design and were not consulted to develop patient-relevant outcomes  
9  
10  
11 102 or interpret the results. Patients were not invited to contribute to the writing or editing of  
12  
13 103 this document for readability or accuracy.

14  
15 104

### 17 105 **Setting and sampling**

18 106 This study was conducted at a regional hospital in the southern part of Sweden. From a total  
19  
20  
21 107 sample of 462 individuals that had completed six weeks in the digital OA management  
22  
23  
24 108 program between 2015 and 2018, 73 invitations with written information about the study  
25  
26 109 were sent out by e-mail by the first author (AC). The inclusion criterion was clinical hip or  
27  
28  
29 110 knee OA, previously confirmed or diagnosed according to the ACR criteria [25, 26] by an  
30  
31 111 orthopedic surgeon involved in the program. The exclusion criteria were i) reporting other  
32  
33  
34 112 joints than hip or knee as the primary joint for OA symptoms, and ii) not understanding  
35  
36 113 and/or speaking Swedish. The participants were purposefully selected in order to represent  
37  
38  
39 114 both sexes, different age groups, perceived pain and physical function [27]. Twenty-one  
40  
41 115 participants accepted the invitation to participate in this study. Two were excluded as one  
42  
43  
44 116 did not speak Swedish and one did not return our phone calls. Ten women and nine men,  
45  
46  
47 117 median age 66 (q1-q3, 57-71) years were consecutively included in the study. Their primary  
48  
49  
50 118 OA joint location was either in the knee (48%) or hip (52%) (See Table 1 for participant  
51  
52  
53 119 characteristics). All participants in this study completed the program via stationary  
54  
55  
56 120 computers, laptops or mobile phones. The Regional Ethical Review Board in Lund, Sweden  
57  
58 121 (Dnr 2017/651; Dnr 2017/980) approved the study and all patients gave their written  
59  
60 122 informed consent prior to participation.

123



## 124 **Data collection**

125 The interviews were conducted by two of the authors (JE & AC), either as face-to-face  
126 interviews, by Skype or by telephone, depending on the participant's location and access to  
127 Skype. The semi-structured interview guide included areas of interest such as 1) experiences  
128 of living with OA, 2) prior experiences of OA management, 3) experiences of the digital  
129 management program (e.g., set-up, educational contents, feed-back, feed-forward,  
130 availability and design), and 4) experiences of factors that may have increased their  
131 motivation, persistence and emotional reactions. In addition, the participants were asked to  
132 suggest possible improvements to the program. Follow-up questions were used to  
133 encourage the participants to elaborate on the subject and to explain or clarify the meaning  
134 and consequences of their experiences. The interview guide and follow-up questions were  
135 pilot tested on three older individuals with OA, not included in the study and was then  
136 subjected to minor editing. The interviews, which lasted approximately 30-40 minutes, were  
137 recorded and transcribed verbatim. Data collection stopped when no further information  
138 was added. See Appendix 1 for interview guide.

139

## 140 **Data analysis**

141 The transcripts were analyzed using systematic text condensation (STC) according to  
142 Malterud [28], which is based on Giorgi's phenomenological analysis [29]. The procedure of  
143 the analysis consists of the following steps: 1) creating an overall impression and identifying  
144 themes; 2) distinguishing and sorting meaning units to codes; 3) formulating the meaning of  
145 each code meaning and 4) synthesizing the condensed meaning into descriptions and  
146 concepts (See Appendix 2 for examples). STC was chosen as the procedure facilitates cross-  
147 case synthesis of text and meaning [28]. Consequently, in the first step, the interview

1  
2  
3 148 transcripts were read to get a general impression of the whole and to identify primary  
4  
5 149 themes. Then, meaning units were identified and formulated into codes that represented  
6  
7  
8 150 the core of the statements. During this phase, three of the authors (JE, AC, and CSH) worked  
9  
10 151 individually to identify as many perspectives and perceptions as possible in the material.  
11  
12  
13 152 Next, all authors worked together with the coded data to produce one set of data, extracting  
14  
15 153 duplicates and data that were not relevant for the aim of the study. The coded data were  
16  
17 154 then organized into subcategories, and the content of the meaning units of each category  
18  
19 155 was re-examined. The meaning and representation of the data was formulated into aspects  
20  
21 156 representing the content. Thereafter, the subcategories were organized into categories. To  
22  
23 157 validate the categories and make sure that no important aspects had been overlooked, the  
24  
25 158 clusters were referred back to the raw data, and read through once again by the authors.  
26  
27 159 Finally, the re-contextualized data was expressed as interpretations of the meaning of each  
28  
29 160 category and representative quotes were selected for each category/subcategory.  
30  
31  
32  
33  
34  
35  
36  
37  
38

## 39 162 **RESULT**

40 163 Three main categories were uncovered during the analysis:

- 41  
42  
43 164 1) Management options for mitigating the consequences of OA,  
44  
45 165 2) Experiences of the digital program, with four sub-categories a) Easy to execute, b)  
46  
47 166 Flexibility to choose when and where, c) The importance of interacting with healthcare  
48  
49 167 professionals and d) Other motivating factors and 3) Perceived effects of the digital program  
50  
51 168 over time, with two subcategories a) Perceived effects of the program after the initial six  
52  
53 169 weeks and b) Reasons for continuing to participate in the program (Figure 1). Participants'  
54  
55 170 suggestions for improving the digital program were also analyzed.  
56  
57  
58  
59  
60 171

### 172 **Management options for mitigating the consequences of OA**

173 This category entailed the experiences of the perceived consequences of OA and their eager  
174 search for a cure that would reduce their symptoms. All participants described symptoms  
175 such as pain, disrupted sleep, deteriorating ability to walk, being immobile, and activity  
176 limitations. Pain was the main motivation for seeking professional management. The  
177 participants also found that their decreased functioning was not only affecting themselves,  
178 but was also a burden on their partners and family. They were trying all sorts of ways to ease  
179 the pain and to regain motor function. They were eager to try any treatment hoping that the  
180 program could reduce their symptoms and improve their quality of life.

181

182 *"I felt that it was impossible to continue in this way as I was in such intense pain..."*

183 (I18)

184

185 *"The expectations that I had were to be more flexible and to reduce the pain.*

186 *That was how I figured it could be."* (I18)

187

### 188 **Experiences of the digital program**

189 This category includes four sub-categories; a) Easy to execute, b) Flexibility to choose when  
190 and where, c) The importance of interacting with healthcare professionals and d) Other  
191 motivating factors. In general, the participants' experiences of the program were positive.  
192 They found the program very easy to execute, flexible, and motivational. The interaction  
193 with the physical therapist was described as important for support and encouragement.

194

1  
2  
3 195 **Easy to execute**

4 196 Most participants were satisfied with the set-up of the program. The program was perceived  
5  
6  
7 197 as structured, educational, and very simple to execute. Other elements that facilitated  
8  
9 198 participation were instructional videos, email reminders, and that the exercises were  
10  
11 199 individually customized with increasing difficulty, but also quickly accomplished.

12  
13  
14 200

15 201 *"This is such a great set-up. Not only the exercises, it's really educational and you*  
16  
17  
18 202 *learn what osteoarthritis is really about."* (I13)

19  
20 203

21  
22  
23 204 *"I found it really easy to follow. It does not take long and it's really good to*  
24  
25 205 *receive these reminders by email"* (I18)

26  
27 206

28  
29 207 However, a few participants perceived some difficulties in understanding how the program  
30  
31  
32 208 worked. They found that the progression of the exercises was not clearly described or that it  
33  
34 209 was difficult to understand specific words used in the videos.

35  
36  
37 210

38  
39 211 *"To me it was hard to follow in the beginning and it actually took some time*  
40  
41  
42 212 *before I understood it correctly. It took like a few weeks until I really got the*  
43  
44 213 *system. And that was a pity I think."* (I8)

45  
46  
47 214

48  
49  
50 215 **Flexibility to choose when and where**

51 216 All participants acknowledged the flexibility that was associated with this digital  
52  
53  
54 217 management program. The ability to execute the exercises at home, or at any place at any  
55  
56 218 time, without any use of equipment was highly appreciated. The ability to control the time  
57  
58 219 point for when to perform the exercises and not having to make a scheduled appointment at  
59  
60

1  
2  
3 220 a specific location, were described as an advantage compared to traditional management,  
4  
5  
6 221 and were further expressed as time-saving and less stressful since participants did not have  
7  
8 222 to take time off from work for OA management. One participant even expressed that she  
9  
10 223 would never have completed such a program if it had not been digital.

11 224

12  
13  
14  
15 225 *“The flexibility, that I could decide on my own when to perform the exercises was*  
16  
17 226 *really good. That I didn’t have any scheduled time point when I had to dress, go*  
18  
19 227 *out, and at this exact time point meet a physical therapist. That I could decide on*  
20  
21 228 *my own...” (I11)*

22 229

23  
24  
25  
26  
27 230 *“I don’t think this is bad at all, to have it on the internet like this. I would never*  
28  
29 231 *have done it if it hadn’t been digital” (I17)*

30 232

31  
32  
33  
34  
35 233 Some participants described that there were long waiting lists for traditional OA  
36  
37 234 management in primary care and that the digital program was, thus, a flexible alternative  
38  
39 235 that they could start at once.

40 236

41  
42  
43 237 *“Yes, it was also like, there was such a long waiting list for primary care. So I*  
44  
45 238 *thought...this...this I can start doing right away.” (I10)*

46 239

#### 47 240 *The importance of interacting with healthcare professionals*

48  
49  
50  
51 241 Receiving an OA diagnosis without any physical meeting was perceived as a bit awkward to  
52  
53 242 some participants. Some concerns were revealed regarding the risk of missing serious  
54  
55 243 diseases if the diagnosis was given by phone or internet.

56 244

1  
2  
3 245 *"It's somewhat hard to give a diagnosis over the phone. You can do it, but it's*  
4  
5 246 *more difficult and you can miss things... there could have been a tumor there..."*

7  
8 247 (I14)

9  
10 248  
11  
12 249 The majority of the participants had a very positive experience of the interaction with their  
13  
14  
15 250 online physical therapist. They described that they received fast responses to their  
16  
17 251 questions, as well as information and encouragement, and that they often received feedback  
18  
19 252 within a few hours. Some expressed that the engagement from their physical therapist was  
20  
21 253 valuable for support and encouragement, especially if they experienced pain during the  
22  
23 254 exercises. The daily contact with their physical therapist encouraged them to perform their  
24  
25 255 exercises every day, which was also perceived as an advantage compared to traditional care  
26  
27 256 management.  
28  
29  
30

31  
32 257  
33  
34 258 *"I think it's excellent to have daily contact. I think it's outstanding. That puts*  
35  
36 259 *pressure on me to really do these exercises and to answer him [the physical*  
37  
38 260 *therapist] and to give him an opportunity to give feedback and information about*  
39  
40 261 *other things... You can't go to a physical therapist every day, every day, every*  
41  
42 262 *day. That won't work. They won't have time for me, they have others to take care*  
43  
44 263 *of as well. "* (I12)

45  
46 264  
47  
48  
49  
50  
51 265 In contrast, some participants experienced the contact with their online physical therapist to  
52  
53 266 be unsatisfactory or even non-existent. They described that it could take a week before they  
54  
55 267 received any response, that the questions were only partly answered, or that they received  
56  
57  
58  
59  
60

1  
2  
3 268 no answer at all. Continuous follow-up with feedback and encouragement on their  
4  
5  
6 269 performance in the program was also lacking.  
7

8 270  
9  
10 271 *"In the beginning they said that someone would get in touch with me on a*  
11  
12  
13 272 *regular basis and things like that. But this hasn't happened as I expected"* (19)  
14

15 273  
16  
17 274 **Other motivating factors**  
18  
19 275 The daily email reminders were typically highlighted as a motivator since they ensured that  
20  
21 276 participants did not forget about the exercises and pushed them to perform the activities  
22  
23 277 every day. Improved OA symptoms, and the measurement feedback system provided by the  
24  
25  
26 278 program were other factors that were mentioned as contributing to the participants'  
27  
28 279 motivation to perform the exercises.  
29

30  
31 280  
32 281 *"It was there, popped up in my email box every day. OK, today I'll do this*  
33  
34 282 *exercise...it was something that pushed me. That was good I think...I needed*  
35  
36 283 *that."* (18)  
37  
38

39 284  
40  
41  
42  
43 285 **Perceived effects of the digital program over time**  
44 286 This category includes two sub-categories; a) Perceived effects of the program after  
45  
46 287 the initial six weeks and b) Reasons for continuing to participate in the program. The  
47  
48  
49 288 majority of the participants reported improved functioning and reduced pain.  
50  
51 289 However, some people felt no improvements and that their symptoms were the same  
52  
53  
54 290 as before entering the program. Many continued to participate in the program after  
55  
56 291 the initial six weeks to maintain the positive improvements. Although the participants  
57  
58  
59  
60

1  
2  
3 292 were positive to the digital program, they suggested a broader variation of exercises  
4  
5  
6 293 as well as follow-ups by video calls.  
7

8 294  
9

10  
11 295 *Perceived effects of the digital program after the initial six weeks*

12 296 Several participants experienced significant reductions in OA symptoms after completing the  
13  
14  
15 297 program. Improvements commonly mentioned were reduced pain, increased flexibility, and  
16  
17 298 improved walking abilities. In many cases the symptoms were still present but were  
18  
19  
20 299 perceived to have improved significantly, leading to increased quality of life and less focus  
21  
22 300 on the disease. Many described that they had recommended the program to friends and  
23  
24 301 relatives suffering from hip or knee OA, since they were satisfied with the result and wished  
25  
26  
27 302 that more people could undergo the same management program.  
28

29 303  
30

31  
32 304 *“It has helped me fantastically. I don’t think I could have walked the way I do*  
33  
34 305 *today if I hadn’t done this... I don’t think so... I think this program has had an*  
35  
36 306 *absolute crucial role in the fact that I can manage my everyday life as well as I*  
37  
38 307 *can now, even though I have quite big problems.” (I2)*  
39  
40

41 308  
42  
43

44 309

45 310 Not all participants perceived that they had reduced symptoms or improvements after six  
46  
47  
48 311 weeks in the program. Some described that their symptoms were still the same or had  
49  
50 312 initially improved, and then worsened with deteriorating physical function and increased  
51  
52  
53 313 pain. However, several of these participants still believed in the set-up despite not  
54  
55 314 experiencing the results they wished for. This lack of positive results was attributed to a  
56  
57  
58 315 belief that they entered the program too late, i.e., that the exercises might have helped if  
59  
60



1  
2  
3 316 they had started at an earlier stage of the disease, or that the exercises may have slowed  
4  
5  
6 317 down the disease progression.  
7

8 318  
9  
10 319 *“The sad thing is that even if I do these exercises, every day, every week, every*  
11  
12  
13 320 *month, every year... nothing happens... I don’t get any better.” (14)*  
14

15 321  
16  
17 322 *“It felt really good in the beginning. The reason that it didn’t help me is probably*  
18  
19  
20 323 *because I started too late.” (112)*  
21

22 324

23 325

24 326 *Reasons for continuing to participate in the program*

25 327

26 328 Many continued to do their exercises after the six weeks evaluation. Perceived functional  
27  
28  
29  
30 329 improvements and pain reduction as well as fear of the symptoms worsening were highly  
31  
32  
33 330 motivating factors for continuing to perform the exercises. Another reason was that it might  
34  
35 331 help them to be well prepared for any upcoming surgery.  
36

37 332

38  
39 333 *“I believe in these exercises. I believe that exercise is good for osteoarthritis. I am*  
40  
41  
42 334 *convinced. And I think... if I stop doing this... then this terrible pain will start*  
43  
44  
45 335 *again.” (18)*  
46

47 336

48  
49 337 On the other hand, reduced pain and scheduled surgery were described by some  
50  
51  
52 338 participants as reasons for not continuing the program.  
53

54  
55 339  
56  
57  
58  
59  
60

1  
2  
3 340 *"The pain was generally reduced... and then I did not feel as motivated as before*  
4  
5  
6 341 *so I quit doing the exercises... yes I did. Generally, in physical therapy, it's hard to*  
7  
8 342 *keep your motivation up if you don't have a lot of pain."* (I19)  
9

10 343  
11  
12 344 *"I have met with my orthopedist and I'm scheduled for surgery... I feel that the*  
13  
14  
15 345 *end of this problem is near. That's why I'm not performing the exercises as I*  
16  
17 346 *should anymore."* (I18)  
18  
19

20  
21 347

### 22 348 **Suggestions for improving the digital program**

23 349 The participants suggested a few possible improvements to the digital program. For  
24  
25  
26 350 example, many experienced that there were too few exercises with little variation, and the  
27  
28  
29 351 exercises were perceived as somewhat monotonous after a while, especially if the  
30  
31  
32 352 participants were highly active in the program, i.e., carried out exercises several days a  
33  
34 353 week. It was suggested that varying and/or adding more exercises would increase  
35  
36 354 motivation to perform them.  
37  
38

39 355 *"In the end it became a bit boring since there were so few movements... so I*  
40  
41  
42 356 *added some extra on my own... It was a bit boring to do the same thing every*  
43  
44 357 *day."* (I14)  
45  
46

47 358

48  
49 359 Some participants that were not satisfied with the communication with the  
50  
51  
52 360 online physical therapist suggested improved patient-physical therapist  
53  
54 361 interaction using increased feedback and encouragement. Another suggestion  
55  
56 362 included follow-ups video calls or Skype to enhance feedback on the individual  
57  
58  
59 363 performance of specific exercises  
60

1  
2  
3 364  
4  
5  
6 365  
7  
8 366  
9  
10 367  
11  
12  
13 368  
14

*“You could send a video via internet and the physical therapist will then check that you have performed the exercise and performed it correctly and correct you if you have performed it incorrectly.” (I19)*

## 369 DISCUSSION

370 We sought to investigate participant experiences of a digital management program for hip  
371 and knee OA. The majority of the participants reported improvements after the initial six  
372 weeks, such as reduced pain, increased mobility, and a sense of improved quality of life. In  
373 general the participants found that the program was easy to execute. The flexibility of being  
374 able to perform the exercises anywhere and at any time point was highly appreciated. The  
375 daily contact with the physical therapist was considered very important and an advantage  
376 compared to traditional care and the participants felt that the support and encouragement  
377 they received was important to continue exercising. In addition, the participants suggested  
378 more variation in the exercises and follow-up by video-calls.

379  
380 Despite international guidelines [12], many patients with hip and knee OA do not receive  
381 appropriate treatment and information regarding OA management options [4, 13, 14]. Web-  
382 based or digital management programs have been proposed as an option for facilitating the  
383 implementation of non-surgical treatment as they have the potential to reach more  
384 individuals in need of OA treatment [4]. The participants in the current study were mostly  
385 positive to the set-up of the program. Being able to perform the exercises whenever and  
386 wherever they desired, without needing to take time off from work, was described as  
387 valuable. Several participants also mentioned that the digital program was something they

1  
2  
3 388 could start doing right away instead of being put on a waiting list. They also experienced the  
4  
5 389 program to be educational and they felt motivated by the daily email reminders and the  
6  
7  
8 390 feedback system that were provided by the program. This result is in line with previous  
9  
10 391 studies investigating patient perceptions of digital OA management, e.g., through internet or  
11  
12 392 tele rehabilitation, where the participants experienced such programs to be convenient and  
13  
14  
15 393 time-saving [30, 31].  
16  
17

18 394  
19  
20  
21 395 Exercise is one of the cornerstones of OA management [12]. However, the outcome of the  
22  
23 396 OA management program is highly dependent on adherence to the exercises. People with  
24  
25 397 OA is reported to be among those with particularly poor adherence to this type of treatment  
26  
27 398 [32], although there seem to be good adherence to treatment delivered online in these  
28  
29  
30 399 patients [33]. A recent systematic review of people with hip and knee OA identified factors  
31  
32 400 such as increased knowledge of the disease and benefits of exercise, reduced symptoms,  
33  
34 401 easy access to training facilities, and the ability to fit the exercises into daily life as facilitating  
35  
36 402 exercise participation, whereas long travel time and parking difficulties were considered as  
37  
38 403 barriers [34]. The results from the current study indicate that a digital program may facilitate  
39  
40 404 participation in OA management programs and eliminate some of the barriers associated  
41  
42 405 with exercise participation, such as access and time constraints, and further highlights the  
43  
44 406 importance of adequate information and education regarding the benefits of exercise and  
45  
46 407 different treatment options in OA. In addition, a digital delivery also enables the patients to  
47  
48 408 continue their treatment week after week to further improvements and to sustain their  
49  
50 409 achieved behavioral change.  
51  
52  
53  
54  
55  
56  
57  
58 410  
59  
60

1  
2  
3 411 Previous research indicates that support and encouragement from healthcare staff are  
4  
5 412 important factors in facilitating exercise participation in people with hip and knee OA [34].  
6  
7  
8 413 This was also reflected in the current study. Interaction with the physical therapist was  
9  
10 414 another important aspect that was highlighted by the participants. Most participants had a  
11  
12  
13 415 positive experience of the contact with their assigned physical therapist and they were  
14  
15 416 highly motivated by the daily contact and the support and encouragement that were  
16  
17  
18 417 provided. This result further emphasizes previous findings that a strong therapeutic alliance  
19  
20 418 can be established without meeting in person [35-37]. However, some participants were not  
21  
22  
23 419 satisfied with the contact, which in turn lowered their motivation to perform the exercises.  
24  
25 420 This may indicate that support and encouragement from the physical therapist are  
26  
27 421 prerequisites for a satisfactory experience of a digital OA management program.  
28  
29  
30 422  
31  
32 423 In accordance with studies on tele rehabilitation, [30, 31], some concerns were expressed in  
33  
34  
35 424 our interviews about being diagnosed online. A few patients were afraid that they may have  
36  
37 425 been suffering from a more serious disease, such as cancer, and that a differential diagnosis  
38  
39  
40 426 may be difficult via the internet. It is therefore important to respond to these worries  
41  
42 427 accordingly, and provide the patients with information that explains that OA is primarily  
43  
44  
45 428 diagnosed by symptoms and signs without any use of radiography or laboratory equipment  
46  
47 429 [38]. Also, some participants wished to have follow-ups via video call to eliminate the risk of  
48  
49  
50 430 performing the exercises incorrectly. This is consistent with previous studies reporting that  
51  
52 431 non-supervised home-based exercises can give rise to concerns regarding the correct  
53  
54 432 performance of the exercises [5, 31, 39]. Video calls may, thus, be one way to develop the  
55  
56  
57 433 program further and to optimize the experiences of digital programs without any physical  
58  
59 434 meeting. However, the influence of video conversations needs further study.  
60

1  
2  
3 435  
4  
5  
6 436 The results confirmed the findings of previous studies, in that the participants reported that  
7  
8 437 the most important results of the program were improvements such as reduced pain,  
9  
10 438 increased flexibility, and improved walking abilities [18, 19], which brought a sense of  
11  
12  
13 439 improved quality of life and less focus on the disease. Interestingly, reduced pain and being  
14  
15 440 scheduled for surgery were two factors described as both facilitators and barriers to  
16  
17  
18 441 continuing in the program. Some participants continued to exercise because they  
19  
20 442 experienced that the program had reduced their pain and they were afraid that the pain  
21  
22  
23 443 would come back if they stopped doing the exercises. In contrast, some felt that reduced  
24  
25 444 pain was a reason to stop doing the exercises, as their motivation was lost when pain no  
26  
27  
28 445 longer was an issue. Likewise, some participants continued to exercise since they wanted to  
29  
30 446 be ready and as fit as possible for a total joint replacement (TJR), whereas others quit doing  
31  
32  
33 447 the exercises when they were scheduled for TJR as they believed the surgery would solve  
34  
35 448 their problems anyway. Pre-surgery exercise is known to improve outcomes such as length  
36  
37  
38 449 of hospitalization, knee range of motion, and physical function after total knee replacements  
39  
40 450 [40] and such information is, therefore, important to include in the educational material to  
41  
42 451 facilitate recovery after any future TJRs in these patients.  
43  
44

45 452  
46  
47 453 One strength of this study is that the participants were purposefully selected, including both  
48  
49 454 men and women who differed in age, OA severity, physical function, and OA location (hip or  
50  
51  
52 455 knee) from different parts of Sweden. However, since the participants were located all over  
53  
54 456 Sweden, the interviews were mostly conducted by telephone or via Skype. This approach  
55  
56  
57 457 may have resulted in less depth of the interviews due to a loss of visual input. Also, two of  
58  
59 458 the participants completed the program more than one year prior to the interviews, which  
60

1  
2  
3 459 may have influenced their recollection of the program and thereby also the experiences  
4  
5  
6 460 expressed during the interviews. Another limitation may be that some demographic data of  
7  
8 461 the participants, such as education level, previous experience of using digital applications  
9  
10 462 and year of OA diagnosis were not recorded. This information may have increased the  
11  
12  
13 463 generalizability of the results.  
14

15 464

16  
17  
18 465 Throughout the data analysis reflexivity has been considered, i.e., we have been aware that  
19  
20 466 the pre-understanding that the authors may have as clinicians and researchers could affect  
21  
22 467 the data, if one is not fully aware of previous experiences [41]. All authors worked separately  
23  
24 468 during the data processing and there were continuous discussions during the analysis aimed  
25  
26 469 at eliminating possible influences of previous experiences, which helped us to stay neutral to  
27  
28 470 the data. In addition, we have also presented a signature after each quotation to show the  
29  
30 471 representation of our participants, and to add transparency and trustworthiness to our  
31  
32 472 findings and interpretations of the data.  
33  
34  
35  
36  
37

### 38 473 **CONCLUSION**

39 474 A digital management program for OA, including education and exercise as well as  
40  
41 475 asynchronous chats with an assigned physical therapist for feedback, questions and  
42  
43 476 engagement, may be an alternative to traditional treatment and further facilitate the  
44  
45 477 implementation of OA guidelines in a wider community. The participants had mostly positive  
46  
47 478 experiences of the program, the flexibility of the program with regards to location and time.  
48  
49 479 Regular and frequent contact with a physical therapist was deemed particularly important  
50  
51 480 for a positive experience of the program and was also emphasized as an advantage  
52  
53 481 compared to traditional care. In addition, the result of this study will contribute to the  
54  
55 482 further development and improvement of digital management for OA.  
56  
57  
58  
59  
60

1  
2  
3 483  
4  
5 484 **AUTHORS' CONTRIBUTION**  
6  
7 485 Anna Cronström, PhD contributed to the design of the study, conducted part of the  
8  
9 486 interviews, was responsible for the analysis and interpretation of the data, and was in charge  
10  
11 487 of writing the manuscript. Leif E Dahlberg, PhD contributed to the conception and design of  
12  
13 488 the study, contributed to the interpretation of the data, and provided feedback on drafts of  
14  
15 489 this paper. Håkan Nero, PhD contributed to the conception and design of the study,  
16  
17 490 contributed to the analysis and interpretation of the data, and provided feedback on drafts  
18  
19 491 of this paper. Jennifer Ericson, BSc student contributed to the conception and design of the  
20  
21 492 study, conducted part of the interviews, contributed to the analysis and interpretation of the  
22  
23 493 data, and provided feedback on drafts of this paper. Catharina Sjö Dahl Hammarlund, PhD  
24  
25 494 contributed to the conception and design of the study, contributed to the analysis and  
26  
27 495 interpretation of the data, and provided feedback on drafts of this paper. All authors have  
28  
29 496 read and approved the final manuscript.  
30  
31  
32  
33  
34  
35  
36  
37  
38

39 498 **FUNDING**  
40  
41 499 This research was funded by Vinnova, Sweden's Innovation Agency, by Governmental  
42  
43 500 Funding of Clinical Research within the National Health Service (ALF), the Faculty of  
44  
45 501 Medicine, Lund University and by Region Skåne.  
46  
47  
48  
49  
50

51 503 **COMPETING INTEREST**  
52  
53 504 HN is a physical therapist and part-time consultant at Joint Academy and LED is the co-  
54  
55 505 founder and Chief Medical Officer in the corporation behind the same program. No other  
56  
57 506 relationships or activities exist that could appear to have influenced the submitted work.  
58  
59  
60



1  
2  
3 508 **DATA SHARING STATEMENT**  
4

5 509 The datasets used and/or analyzed during the current study are available from the  
6  
7 510 corresponding author on reasonable request.  
8  
9

10  
11 511 **EXCLUSIVE LICENSE STATEMENT**  
12

13 512 I, the Submitting Author has the right to grant and does grant on behalf of all authors of the  
14  
15 513 Work (as defined in the below author licence), an exclusive licence and/or a non-exclusive  
16  
17 514 licence for contributions from authors who are: i) UK Crown employees; ii) where BMJ has  
18  
19 515 agreed a CC-BY licence shall apply, and/or iii) in accordance with the terms applicable for US  
20  
21 516 Federal Government officers or employees acting as part of their official duties; on a  
22  
23 517 worldwide, perpetual, irrevocable, royalty-free basis to BMJ Publishing Group Ltd ("BMJ") its  
24  
25 518 licensees and where the relevant Journal is co-owned by BMJ to the co-owners of the  
26  
27 519 Journal, to publish the Work in BMJ Open and any other BMJ products and to exploit all  
28  
29 520 rights, as set out in our licence.  
30  
31  
32  
33  
34

35 521  
36  
37 522 The Submitting Author accepts and understands that any supply made under these terms is  
38  
39 523 made by BMJ to the Submitting Author unless you are acting as an employee on behalf of  
40  
41 524 your employer or a postgraduate student of an affiliated institution which is paying any  
42  
43 525 applicable article publishing charge ("APC") for Open Access articles. Where the Submitting  
44  
45 526 Author wishes to make the Work available on an Open Access basis (and intends to pay the  
46  
47 527 relevant APC), the terms of reuse of such Open Access shall be governed by a Creative  
48  
49 528 Commons licence – details of these licences and which Creative Commons licence will apply  
50  
51 529 to this Work are set out in our licence referred to above.  
52  
53  
54  
55  
56  
57

58 530  
59 531  
60

## 532 REFERENCES

- 533
- 534 1. Olthuis JV, Watt MC, Bailey K, Hayden JA, Stewart SH: **Therapist-supported Internet**
- 535 **cognitive behavioural therapy for anxiety disorders in adults.** *The Cochrane database of*
- 536 *systematic reviews* 2016, **3**:Cd011565.
- 537 2. van Beugen S, Ferwerda M, Hoeve D, Rovers MM, Spillekom-van Koulil S, van Middendorp H,
- 538 Evers AW: **Internet-based cognitive behavioral therapy for patients with chronic somatic**
- 539 **conditions: a meta-analytic review.** *Journal of medical Internet research* 2014, **16**(3):e88.
- 540 3. Boogerd EA, Noordam C, Kremer JA, Prins JB, Verhaak CM: **Teaming up: feasibility of an**
- 541 **online treatment environment for adolescents with type 1 diabetes.** *Pediatric diabetes*
- 542 2014, **15**(5):394-402.
- 543 4. Li LC, Cott C, Jones CA, Badley EM, Davis AM: **Improving Primary Health Care in Chronic**
- 544 **Musculoskeletal Conditions through Digital Media: The PEOPLE Meeting.** *JMIR research*
- 545 *protocols* 2013, **2**(1):e13.
- 546 5. Bjork AB, Sjoström M, Johansson EE, Samuelsson E, Umefjord G: **Women's experiences of**
- 547 **internet-based or postal treatment for stress urinary incontinence.** *Qualitative health*
- 548 *research* 2014, **24**(4):484-493.
- 549 6. Verhoeks C, Teunissen D, van der Stelt-Steenbergen A, Lagro-Janssen A: **Women's**
- 550 **expectations and experiences regarding e-health treatment: A systematic review.** *Health*
- 551 *informatics journal* 2017:1460458217720394.
- 552 7. Bidmon S, Terlutter R: **Gender Differences in Searching for Health Information on the**
- 553 **Internet and the Virtual Patient-Physician Relationship in Germany: Exploratory Results on**
- 554 **How Men and Women Differ and Why.** *Journal of medical Internet research* 2015,
- 555 **17**(6):e156.
- 556 8. Powell J, Inglis N, Ronnie J, Large S: **The characteristics and motivations of online health**
- 557 **information seekers: cross-sectional survey and qualitative interview study.** *Journal of*
- 558 *medical Internet research* 2011, **13**(1):e20.
- 559 9. Sanchez-Ortiz VC, House J, Munro C, Treasure J, Startup H, Williams C, Schmidt U: **"A**
- 560 **computer isn't gonna judge you": a qualitative study of users' views of an internet-based**
- 561 **cognitive behavioural guided self-care treatment package for bulimia nervosa and related**
- 562 **disorders.** *Eating and weight disorders : EWD* 2011, **16**(2):e93-e101.
- 563 10. Roetl J, Bidmon S, Terlutter R: **What Predicts Patients' Willingness to Undergo Online**
- 564 **Treatment and Pay for Online Treatment? Results from a Web-Based Survey to Investigate**
- 565 **the Changing Patient-Physician Relationship.** *Journal of medical Internet research* 2016,
- 566 **18**(2):e32.
- 567 11. Pietrzak E, Cotea C, Pullman S, Nasveld P: **Self-management and rehabilitation in**
- 568 **osteoarthritis: is there a place for internet-based interventions?** *Telemedicine journal and e-*
- 569 *health : the official journal of the American Telemedicine Association* 2013, **19**(10):800-805.
- 570 12. Jevsevar DS: **Treatment of osteoarthritis of the knee: evidence-based guideline, 2nd**
- 571 **edition.** *The Journal of the American Academy of Orthopaedic Surgeons* 2013, **21**(9):571-576.
- 572 13. Thorstensson CA, Garellick G, Rystedt H, Dahlberg LE: **Better Management of Patients with**
- 573 **Osteoarthritis: Development and Nationwide Implementation of an Evidence-Based**
- 574 **Supported Osteoarthritis Self-Management Programme.** *Musculoskeletal care* 2015,
- 575 **13**(2):67-75.
- 576 14. Li LC, Sayre EC, Kopec JA, Esdaile JM, Bar S, Cibere J: **Quality of nonpharmacological care in**
- 577 **the community for people with knee and hip osteoarthritis.** *The Journal of rheumatology*
- 578 2011, **38**(10):2230-2237.
- 579 15. Bossen D, Veenhof C, Van Beek KE, Spreeuwenberg PM, Dekker J, De Bakker DH:
- 580 **Effectiveness of a web-based physical activity intervention in patients with knee and/or hip**

- 1  
2  
3 581 **osteoarthritis: randomized controlled trial.** *Journal of medical Internet research* 2013,  
4 582 **15(11):e257.**
- 5 583 16. Griffiths AJ, White CM, Thain PK, Bearne LM: **The effect of interactive digital interventions**  
6 584 **on physical activity in people with inflammatory arthritis: a systematic review.**  
7 585 *Rheumatology international* 2018, **38(9):1623-1634.**
- 8 586 17. Berry A, McCabe CS, Muir S, Walsh N: **Digital behaviour change interventions to facilitate**  
9 587 **physical activity in osteoarthritis: a systematic review.** *Physical Therapy Reviews* 2018,  
10 588 **23(3):197-206.**
- 11 589 18. Nero H, Dahlberg J, Dahlberg LE: **A 6-Week Web-Based Osteoarthritis Treatment Program:**  
12 590 **Observational Quasi-Experimental Study.** *Journal of medical Internet research* 2017,  
13 591 **19(12):e422.**
- 14 592 19. Dahlberg LE, Grahn D, Dahlberg JE, Thorstensson CA: **A Web-Based Platform for Patients**  
15 593 **With Osteoarthritis of the Hip and Knee: A Pilot Study.** *JMIR research protocols* 2016,  
16 594 **5(2):e115.**
- 17 595 20. Smittenaar P, Erhart-Hledik JC, Kinsella R, Hunter S, Mecklenburg G, Perez D: **Translating**  
18 596 **Comprehensive Conservative Care for Chronic Knee Pain Into a Digital Care Pathway: 12-**  
19 597 **Week and 6-Month Outcomes for the Hinge Health Program.** *JMIR rehabilitation and*  
20 598 *assistive technologies* 2017, **4(1):e4.**
- 21 599 21. **Joint Academy** [<https://www.jointacademy.com/se/en/>]
- 22 600 22. Nero H, Dahlberg JE, Dahlberg LE: **Joint academy - a six-week online treatment program for**  
23 601 **osteoarthritis.** In: *Osteoarthritis Research Society International (OARSI).* Liverpool, England:  
24 602 Osteoarthritis and Cartilage; 2018.
- 25 603 23. Jonsson T, Ekvall Hansson E, Thorstensson CA, Eek F, Bergman P, Dahlberg LE: **The effect of**  
26 604 **education and supervised exercise on physical activity, pain, quality of life and self-efficacy**  
27 605 **- an intervention study with a reference group.** *BMC musculoskeletal disorders* 2018,  
28 606 **19(1):198.**
- 29 607 24. Cronstrom A, Nero H, Dahlberg LE: **Factors associated with patients' willingness to consider**  
30 608 **joint surgery after completion of a digital osteoarthritis treatment program: A prospective**  
31 609 **cohort study.** *Arthritis care & research* 2018.
- 32 610 25. Altman R, Alarcon G, Appelrouth D, Bloch D, Borenstein D, Brandt K, Brown C, Cooke TD,  
33 611 Daniel W, Feldman D *et al*: **The American College of Rheumatology criteria for the**  
34 612 **classification and reporting of osteoarthritis of the hip.** *Arthritis and rheumatism* 1991,  
35 613 **34(5):505-514.**
- 36 614 26. Altman R, Asch E, Bloch D, Bole G, Borenstein D, Brandt K, Christy W, Cooke TD, Greenwald R,  
37 615 Hochberg M *et al*: **Development of criteria for the classification and reporting of**  
38 616 **osteoarthritis. Classification of osteoarthritis of the knee. Diagnostic and Therapeutic**  
39 617 **Criteria Committee of the American Rheumatism Association.** *Arthritis and rheumatism*  
40 618 1986, **29(8):1039-1049.**
- 41 619 27. Patton M: **Qualitative evaluation and research methods**, 3rd edn. Thousand Oaks, CA: Sage  
42 620 Publications, Inc; 2002.
- 43 621 28. Malterud K: **Systematic text condensation: a strategy for qualitative analysis.** *Scandinavian*  
44 622 *journal of public health* 2012, **40(8):795-805.**
- 45 623 29. Giorgi A: **Phenomenology and psychological research.** Pittsburgh, PA: Duquesne University  
46 624 Press; 1985.
- 47 625 30. Lawford BJ, Bennell KL, Hinman RS: **Consumer Perceptions of and Willingness to Use**  
48 626 **Remotely Delivered Service Models For Exercise Management of Knee and Hip**  
49 627 **Osteoarthritis: A Cross-Sectional Survey.** *Arthritis care & research* 2017, **69(5):667-676.**
- 50 628 31. Lawford BJ, Delany C, Bennell KL, Hinman RS: **"I was really sceptical...But it worked really**  
51 629 **well": a qualitative study of patient perceptions of telephone-delivered exercise therapy by**  
52 630 **physiotherapists for people with knee osteoarthritis.** *Osteoarthritis and cartilage / OARS,*  
53 631 *Osteoarthritis Research Society* 2018, **26(6):741-750.**

- 1  
2  
3 632 32. Pisters MF, Veenhof C, Schellevis FG, Twisk JW, Dekker J, De Bakker DH: **Exercise adherence**  
4 633 **improving long-term patient outcome in patients with osteoarthritis of the hip and/or**  
5 634 **knee. *Arthritis care & research* 2010, 62(8):1087-1094.**  
6 635 33. de Vries HJ, Kloek CJJ, de Bakker DH, Dekker J, Bossen D, Veenhof C: **Determinants of**  
7 636 **Adherence to the Online Component of a Blended Intervention for Patients with Hip**  
8 637 **and/or Knee Osteoarthritis: A Mixed Methods Study Embedded in the e-Exercise Trial.**  
9 638 *Telemedicine journal and e-health : the official journal of the American Telemedicine*  
10 639 *Association* 2017, **23(12):1002-1010.**  
11 640 34. Dobson F, Bennell KL, French SD, Nicolson PJ, Klaasman RN, Holden MA, Atkins L, Hinman RS:  
12 641 **Barriers and Facilitators to Exercise Participation in People with Hip and/or Knee**  
13 642 **Osteoarthritis: Synthesis of the Literature Using Behavior Change Theory. *American journal***  
14 643 ***of physical medicine & rehabilitation* 2016, 95(5):372-389.**  
15 644 35. Lingely-Pottie P, McGrath PJ: **A therapeutic alliance can exist without face-to-face contact.**  
16 645 *Journal of telemedicine and telecare* 2006, **12(8):396-399.**  
17 646 36. Knaevelsrud C, Maercker A: **Internet-based treatment for PTSD reduces distress and**  
18 647 **facilitates the development of a strong therapeutic alliance: a randomized controlled**  
19 648 **clinical trial. *BMC psychiatry* 2007, 7:13.**  
20 649 37. Muller I, Kirby S, Yardley L: **The therapeutic relationship in telephone-delivered support for**  
21 650 **people undertaking rehabilitation: a mixed-methods interaction analysis. *Disabil Rehabil***  
22 651 **2015, 37(12):1060-1065.**  
23 652 38. Abhishek A, Doherty M: **Diagnosis and clinical presentation of osteoarthritis. *Rheumatic***  
24 653 ***diseases clinics of North America* 2013, 39(1):45-66.**  
25 654 39. Cranen K, Drossaert CH, Brinkman ES, Braakman-Jansen AL, Ijzerman MJ, Vollenbroek-Hutten  
26 655 **MM: An exploration of chronic pain patients' perceptions of home telerehabilitation**  
27 656 **services. *Health expectations : an international journal of public participation in health care***  
28 657 ***and health policy* 2012, 15(4):339-350.**  
29 658 40. Chen H, Li S, Ruan T, Liu L, Fang L: **Is it necessary to perform prehabilitation exercise for**  
30 659 **patients undergoing total knee arthroplasty: meta-analysis of randomized controlled trials.**  
31 660 *The Physician and sportsmedicine* 2018, **46(1):36-43.**  
32 661 41. Malterud K: **Qualitative research: standards, challenges, and guidelines. *Lancet (London,***  
33 662 ***England)* 2001, 358(9280):483-488.**  
34  
35  
36  
37  
38 663  
39  
40  
41  
42  
43  
44  
45  
46  
47  
48  
49  
50  
51  
52  
53  
54  
55  
56  
57  
58  
59  
60

665 **Table 1.** Characteristics of the participants

| 666 | Characteristics                          | n=19             |
|-----|------------------------------------------|------------------|
| 667 | Age mean (min-max)                       | 65 (45-80)       |
| 668 | Sex                                      |                  |
| 668 | Women n                                  | 10               |
| 669 | Men n                                    | 9                |
| 670 | Retired n                                | 10               |
| 670 | OA location                              |                  |
| 671 | Hip n                                    | 10               |
| 671 | Knee n                                   | 9                |
| 672 | Pain baseline (min-max)                  | 6.1 (1-9)        |
| 672 | Physical function baseline (min-max)     | 8.6 (1-14)       |
| 673 | EQ5D-3L index baseline (min-max)         | 0.59 (0.29-0.76) |
| 674 | Activity in the program mean % (min-max) | 80.7 (19-93)     |

675 OA=osteoarthritis, pain was assessed with the Numeric Rating Scale (NRS) from 0-10, where  
 676 0 indicate no pain with higher numbers indicating more severe pain, physical function was  
 677 assessed using the 30-second Chair Stand Test reflecting the number of repetitions of sitting  
 678 to standing from a chair during a period of 30 seconds. EQ5D-3L= EuroQol – 5 dimension  
 679 descriptive system assessing health-related quality of life - a higher EQ-5D-3L index indicates  
 680 better health-related quality of life. Activity level was defined as the proportion of  
 681 completed videos, exercises and questionnaires offered in the program.

682

1  
2  
3  
4  
5  
6  
7  
8  
9  
10  
11  
12  
13  
14  
15  
16  
17  
18  
19  
20  
21  
22  
23  
24  
25  
26  
27  
28  
29  
30  
31  
32  
33  
34  
35  
36  
37  
38  
39  
40  
41  
42  
43  
44  
45  
46  
47  
48  
49  
50  
51  
52  
53  
54  
55  
56  
57  
58  
59  
60

683 **Figure 1.** Overview of the categories and subcategories describing the participants' experiences of  
684 the digital  
685

For peer review only

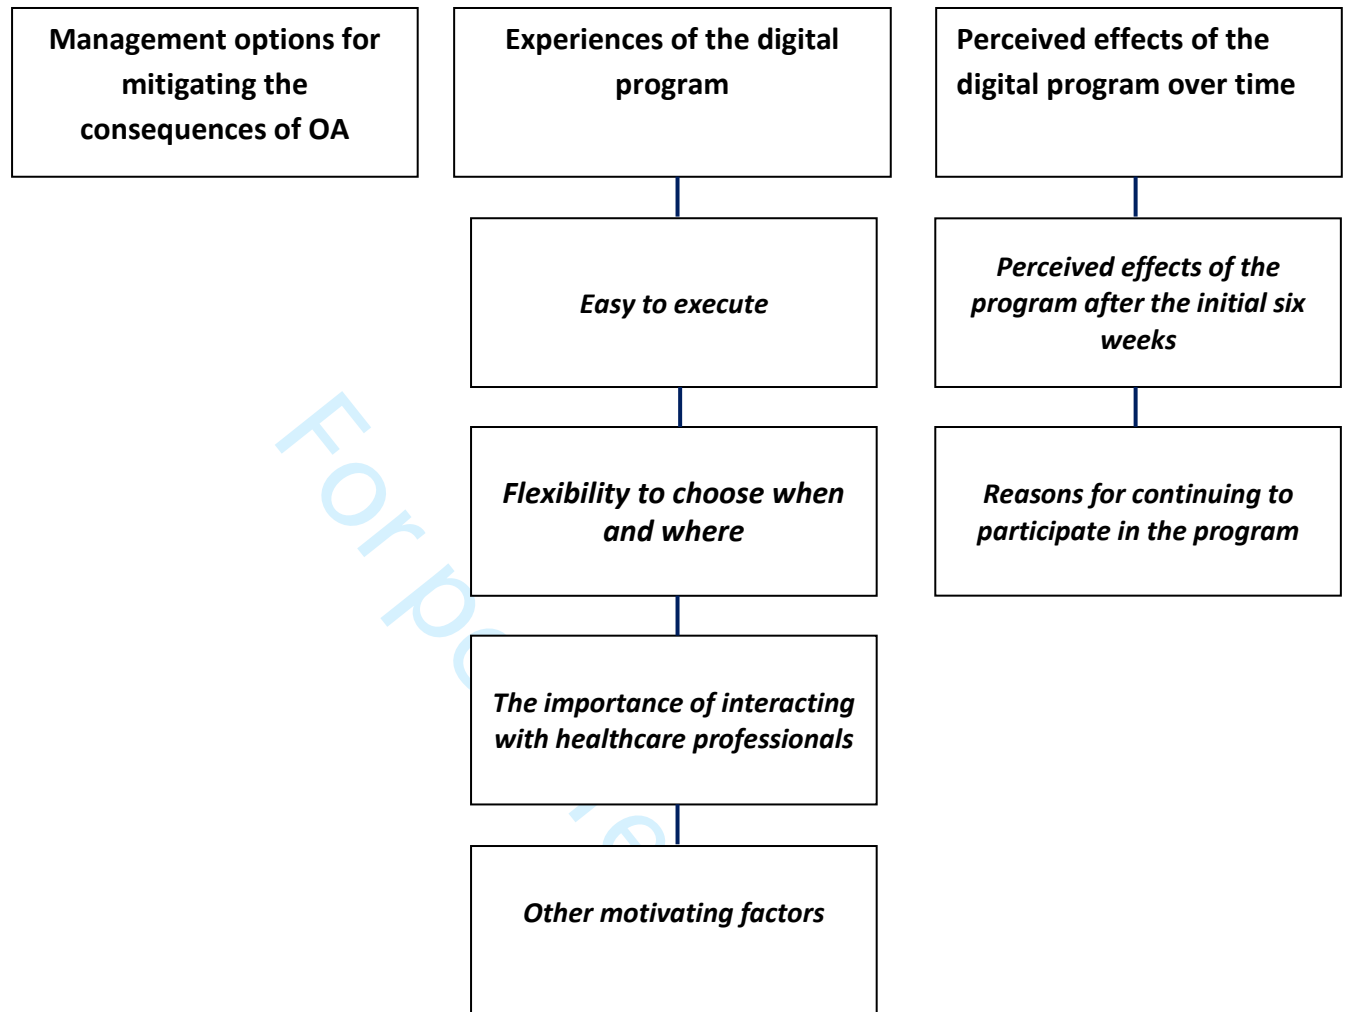

**Figure 1.** Overview of the categories and subcategories describing the participants' experiences of the digital management program for osteoarthritis

1  
2  
3 **Appendix 1. Interview guide - Experiences of a digital management program for hip and**  
4 **knee osteoarthritis** (translated from the Swedish version)  
5  
6  
7

8 How long have you had symptoms from your hip/knee?  
9

10 Could you describe your symptoms before joining the program?  
11

- 12
- 13 • How did your symptoms affect you everyday life?

14 What were your reasons for joining the program?  
15

16 What were your expectations before joining the program?  
17

18 How did you experience the treatment?  
19

- 20
- 21 • Set-up
  - 22 • Exercises
  - 23 • Availability
  - 24 • Layout
- 25

26 How was your motivation for doing the activities?  
27

28 How did you experience your contact with the physical therapist?  
29

30 Do you experience that the treatment has altered your symptoms?  
31

- 32
- 33 • In what way/direction?

34 Have you continued with the program/home exercises after the initial six weeks?  
35

- 36
- 37 • What were your reasons/motivations for continue/not continue?
- 38

39 How do you think Joint Academy could have done a better job in assisting your treatment?  
40  
41  
42  
43

44 At the end of the interview asking the participant to raise any subject not yet covered  
45

46 Throughout the interview the participants were asked to elaborate on the subject and to  
47 explain or clarify the meaning and consequences of their experiences  
48  
49  
50  
51  
52  
53  
54  
55  
56  
57  
58  
59  
60



**Appendix 2****Table 1.** Examples of themes, meaning units, condensation of meaning units, codes and descriptions and concepts.

| Interview and page | Themes               | Meaning units                                                                                             | Condensed meaning unit | Code                                                  | Descriptions and concepts                          |
|--------------------|----------------------|-----------------------------------------------------------------------------------------------------------|------------------------|-------------------------------------------------------|----------------------------------------------------|
|                    |                      |                                                                                                           |                        |                                                       |                                                    |
| 2B3                | Motivation           | I wanted to continue because I know it's good for me. And I know deep inside that exercises will help me. | I know it will help me | Motivated by improvements                             | Other motivating factors                           |
| 3c9                | Flexibility          | I had access 24/7. I could do it when it fitted me.                                                       | When it fitted me      | Could do the exercises when it fitted the participant | Flexibility to choose when and where               |
| 10J4               | Change in OA symptom | Yes, the pain was reduced and almost disappeared some days. I really improved so it was all positive      | Reduced pain           | The program reduced the OA symptoms                   | Perceived effects of the digital program over time |

## COREQ (CONsolidated criteria for REporting Qualitative research) Checklist

A checklist of items that should be included in reports of qualitative research. You must report the page number in your manuscript where you consider each of the items listed in this checklist. If you have not included this information, either revise your manuscript accordingly before submitting or note N/A.

| Topic                                          | Item No. | Guide Questions/Description                                                                                                                                   | Reported on Page No. |
|------------------------------------------------|----------|---------------------------------------------------------------------------------------------------------------------------------------------------------------|----------------------|
| <b>Domain 1: Research team and reflexivity</b> |          |                                                                                                                                                               | NA                   |
| <i>Personal characteristics</i>                |          |                                                                                                                                                               |                      |
| Interviewer/facilitator                        | 1        | JE & AC                                                                                                                                                       | 7 & 22               |
| Credentials                                    | 2        | JE: BSc student, AC: PhD                                                                                                                                      | 22                   |
| Occupation                                     | 3        | JE: Physiotherapy student, AC: Researcher                                                                                                                     | 22                   |
| Gender                                         | 4        | JE & AC: Female                                                                                                                                               |                      |
| Experience and training                        | 5        | Basic training                                                                                                                                                | 7                    |
| <i>Relationship with participants</i>          |          |                                                                                                                                                               |                      |
| Relationship established                       | 6        | No relationship                                                                                                                                               | NA                   |
| Participant knowledge of the interviewer       | 7        | All participants had oral and written information which included that the data collection was part of her Bachelor thesis and future scientific publications. | 6-7                  |
| Interviewer characteristics                    | 8        | JE & AC showed interest and empathy and gave relevant follow-up questions to encourage the participants to elaborate on their narratives.                     |                      |
| <b>Domain 2: Study design</b>                  |          |                                                                                                                                                               |                      |
| <i>Theoretical framework</i>                   |          |                                                                                                                                                               |                      |
| Methodological orientation and Theory          | 9        | Systematic text condensation as described by Malterud, which is based on Giorgis' psychological phenomenological analysis (ref 21,22)                         | 8                    |
| <i>Participant selection</i>                   |          |                                                                                                                                                               |                      |
| Sampling                                       | 10       | The participants were purposefully selected .....different age groups, perceived pain and physical function They were consecutively included...               | 6-7                  |
| Method of approach                             | 11       | Seventy three invitations with written information about the study were sent out by e-mail. Twenty-one accepted the invitation.                               | 6                    |
| Sample size                                    | 12       | Nineteen participated...                                                                                                                                      | 7                    |
| Non-participation                              | 13       | Two were excluded. One did not speak Swedish, one could not be reached.                                                                                       | 7                    |
| <i>Setting</i>                                 |          |                                                                                                                                                               |                      |
| Setting of data collection                     | 14       | Mostly in their homes using Skype or telephone, two personal interviews                                                                                       | 7                    |
| Presence of non-participants                   | 15       | None else were present besides the participants and researchers.                                                                                              | NA                   |
| Description of sample                          | 16       | Ten women and nine men, median age 66 (q1-q3, 57-71) years, OA joint location was either in the knee (48%) or hip (52%).                                      | 7                    |
| <i>Data collection</i>                         |          |                                                                                                                                                               |                      |
| Interview guide                                | 17       | The interview guide and follow-up questions were pilot tested and were then subjected to minor editing.                                                       | 7                    |
| Repeat interviews                              | 18       | No repeat interviews were carried out                                                                                                                         | NA                   |
| Audio/visual recording                         | 19       | The interviews were recorded.                                                                                                                                 | 8                    |
| Field notes                                    | 20       | Field notes was taken with regard to emotinal reactions and so on.                                                                                            |                      |
| Duration                                       | 21       | The duration was approximately 30-40 minutes.                                                                                                                 | 8                    |
| Data saturation                                | 22       | Data collection stopped when no further information was added.                                                                                                | 8                    |
| Transcripts returned                           | 23       | The transcripts were not returned to participants for comment and/or                                                                                          | NA                   |

| Topic                                  | Item No. | Guide Questions/Description                                                                                         | Reported on Page No. |
|----------------------------------------|----------|---------------------------------------------------------------------------------------------------------------------|----------------------|
|                                        |          | correction.                                                                                                         |                      |
| <b>Domain 3: analysis and findings</b> |          |                                                                                                                     |                      |
| <i>Data analysis</i>                   |          |                                                                                                                     |                      |
| Number of data coders                  | 24       | Three authors coded the data (JE,AC,CSH)                                                                            | 8                    |
| Description of the coding tree         | 25       | The coding tree was not provided.                                                                                   | NA                   |
| Derivation of themes                   | 26       | The themes derived from the data.                                                                                   | 8                    |
| Software                               | 27       | No software was used to manage the data.                                                                            | NA                   |
| Participant checking                   | 28       | The participants did not provide feedback on the findings.                                                          | NA                   |
| <i>Reporting</i>                       |          |                                                                                                                     |                      |
| Quotations presented                   | 29       | Participant quotations was presented to illustrate the findings and each quotation was identified with a signature. | 21                   |
| Data and findings consistent           | 30       | The data was rich, varied and consistent. No triangulation was done.                                                | 21                   |
| Clarity of major themes                | 31       | Major themes were clearly presented in the findings.                                                                | 8-17                 |
| Clarity of minor themes                | 32       | There is a description of diverse cases and discussion of minor themes.                                             | 18-21                |

Developed from: Tong A, Sainsbury P, Craig J. Consolidated criteria for reporting qualitative research (COREQ): a 32-item checklist for interviews and focus groups. *International Journal for Quality in Health Care*. 2007. Volume 19, Number 6: pp. 349 – 357

**Once you have completed this checklist, please save a copy and upload it as part of your submission. DO NOT include this checklist as part of the main manuscript document. It must be uploaded as a separate file.**

# BMJ Open

**I would never have done it if it hadn't been digital": A qualitative study on patients' experiences of a digital management program for hip and knee osteoarthritis in Sweden**

|                                 |                                                                                                                                                                                                                                                                                                                                                                                                                                                                                                                                                                     |
|---------------------------------|---------------------------------------------------------------------------------------------------------------------------------------------------------------------------------------------------------------------------------------------------------------------------------------------------------------------------------------------------------------------------------------------------------------------------------------------------------------------------------------------------------------------------------------------------------------------|
| Journal:                        | <i>BMJ Open</i>                                                                                                                                                                                                                                                                                                                                                                                                                                                                                                                                                     |
| Manuscript ID                   | bmjopen-2018-028388.R2                                                                                                                                                                                                                                                                                                                                                                                                                                                                                                                                              |
| Article Type:                   | Research                                                                                                                                                                                                                                                                                                                                                                                                                                                                                                                                                            |
| Date Submitted by the Author:   | 18-Apr-2019                                                                                                                                                                                                                                                                                                                                                                                                                                                                                                                                                         |
| Complete List of Authors:       | Cronström, Anna; Lund University, Department of Clinical Sciences, Orthopedics, Lund University<br>Dahlberg , Leif ; Department of Clinical Sciences Lund, Orthopedics, Faculty of Medicine, Lund University; Clinical Epidemiology Unit<br>Nero, Håkan; Lunds Universitet, Department of Clinical Sciences Lund, Lund University<br>Ericson, Jennifer; Lund University, Department of Health Sciences<br>Hammarlund, Catharina Sjö Dahl; Lund University, Department of Health Sciences; Kristianstad University, The PRO-CARE Group, School of Health and Society |
| <b>Primary Subject Heading</b>: | Rehabilitation medicine                                                                                                                                                                                                                                                                                                                                                                                                                                                                                                                                             |
| Secondary Subject Heading:      | Rehabilitation medicine                                                                                                                                                                                                                                                                                                                                                                                                                                                                                                                                             |
| Keywords:                       | osteoarthritis, e-health, non-surgical management                                                                                                                                                                                                                                                                                                                                                                                                                                                                                                                   |
|                                 |                                                                                                                                                                                                                                                                                                                                                                                                                                                                                                                                                                     |

SCHOLARONE™  
Manuscripts

1  
2  
3 1 **Original research article**  
4

5 2

6  
7 3 **“I would never have done it if it hadn’t been digital”: A qualitative study on**  
8 **patients’ experiences of a digital management program for hip and knee**  
9 **osteoarthritis in Sweden**  
10  
11 5

12  
13 6 Anna Cronström<sup>1</sup>, Leif E Dahlberg<sup>1, 2</sup>, Håkan Nero<sup>1</sup>, Jennifer Ericson<sup>3</sup>, Catharina Sjö Dahl  
14 7 Hammarlund<sup>3,4</sup>,  
15

16 8

17  
18 9 <sup>1</sup>Orthopaedics, Department of Clinical Sciences Lund, Lund University, Lund, Sweden  
19

20  
21 10 <sup>2</sup>Skåne University Hospital, Lund, Sweden  
22

23 11 <sup>3</sup> Department of Health Sciences, Lund University, Lund, Sweden  
24

25  
26 12 <sup>4</sup> The PRO-CARE Group, School of Health and Society, Kristianstad University, Kristianstad,  
27  
28 13 Sweden  
29

30 14

31  
32  
33 15 Correspondence to: Anna Cronström, Orthopaedics, Department of Clinical Sciences, Lund  
34  
35 16 University, Lund, Sweden. [anna.cronstrom@med.lu.se](mailto:anna.cronstrom@med.lu.se), +46707488770  
36  
37

38 17

39  
40 18 **Keywords:** e-health; digital management; osteoarthritis  
41  
42  
43  
44  
45  
46  
47  
48  
49  
50  
51  
52  
53  
54  
55  
56  
57  
58  
59  
60

## 19 ABSTRACT

### 20 Objectives

21 To investigate the experiences of a digital management program for hip and knee  
22 osteoarthritis (OA), including education and exercises as well as an option to chat with an  
23 assigned physical therapist for feedback, questions and support.

### 24 Setting

25 This study was conducted at a regional hospital in the southern part of Sweden.

### 27 Methods

28 Nineteen patients (10 women), median age 66 (q1-q3, 57-71) years, with confirmed hip or  
29 knee OA were interviewed after completing their first six weeks in the program, using a  
30 semi-structured interview guide. The interviews were transcribed verbatim and were  
31 qualitatively analyzed using systematic text condensation.

### 33 Results

34 Three categories emerged during the interviews:

35 1) *Management options for mitigating the consequences of OA*; 2) *Experiences of the digital*  
36 *program* and 3) *Perceived effects of the digital program over time*. The participants had  
37 mostly positive experiences of the program. Particularly important for these experiences  
38 were no waiting list, the flexibility of taking part in the program with regards to location and  
39 time, and the possibility to have daily contact with a physical therapist. These aspects were  
40 also emphasized as advantages compared to traditional care.

41

## 42 Conclusions

43 Digital management of OA, including education and exercise, was experienced as a valid  
44 alternative to traditional treatment in enabling the implementation of OA guidelines in a  
45 wider community. Easy access, exercising at one's own convenience, flexible options, daily  
46 follow-up and support by a physical therapist were mentioned as the most important  
47 features. In addition, the results will contribute to further development and improvement of  
48 digital OA management programs.

49

50

51

52

**Strengths and limitations of this study**

- Participants were purposefully selected, including both sexes, who differed in age, osteoarthritis severity and physical function in order to have rich and varied data, when synthesizing shared patterns across cases
- The use of a systematic text condensation analysis method facilitated cross-case synthesis of text and meaning
- Conducting the interviews via telephone may have resulted in less depth of the interviews due to a loss of visual input, but also allowed inclusion of participants from a wide geographic area.



## 53 BACKGROUND

54 Due to a combination of decreasing healthcare resources, long waiting lists, and difficulty to  
55 meet the demands of the modern individual who often has a busy schedule, the use of web-  
56 based or digital management options in healthcare, has increased significantly during the  
57 last decade [1-3]. Accessibility and flexibility, social motives and an option for anonymity and  
58 confidentiality are common arguments for choosing digital options [4-10]. A recent review  
59 also suggests that it may be easier to seek care and to incorporate the training into daily life  
60 when it is accompanied by the flexibility and anonymity that online delivery provides, and  
61 that some people even rated their relationship with the online-therapist higher than their  
62 relationship with their ordinary therapist [6]. However, web-based or digital management  
63 for musculoskeletal disorders have thus far not been studied to any great extent [11].

64  
65 Individuals with osteoarthritis (OA) constitute one group of patients for whom digital  
66 management may be highly beneficial [4, 11]. As concluded previously in various literature,  
67 the guidelines for OA treatment (education, exercise and weight management)[12] are not  
68 always implemented and few individuals with OA receive adequate management [4, 13, 14].  
69 Lack of healthcare resources, living in rural areas, and having a lower level of education are  
70 all factors that may reduce the likelihood of receiving appropriate information on  
71 management options for OA [4, 14]. Web-based or digital interventions for OA have been  
72 suggested as a way to make the availability of guideline-based OA management accessible to  
73 a wider community [4, 11, 15]. Unlike in patients with inflammatory arthritis where digital  
74 management does not seem to increase physical activity or quality of life [16], a few studies

1  
2  
3 75 have shown promising results of digital interventions on physical activity [17], pain and  
4  
5  
6 76 physical function in patients with hip or knee OA [11, 15, 18-20].  
7  
8  
9 77  
10  
11  
12 78 Joint Academy [19, 21, 22], was developed in Sweden and is a digital version of the evidence-  
13  
14 79 based face-to-face self-management program *Better Management of Patients with*  
15  
16 80 *OsteoArthritis* (BOA) [13, 23]. The program, as thoroughly described previously [19],  
17  
18 81 comprises OA education (instructional videos on OA, physical activity and weight  
19  
20 82 management), individualized neuromuscular exercises with increasing difficulty aiming at  
21  
22 83 improving lower extremity strength and neuromuscular control, and an option to chat  
23  
24 84 asynchronously with an assigned physical therapist for feedback and questions. Studies have  
25  
26 85 shown that completing the introduction phase of six weeks in this digital OA management  
27  
28 86 program reduces pain and medication intake, increases physical function and walking ability,  
29  
30 87 as well as reduces the willingness for surgery [18, 19, 24]. However, patient experience of  
31  
32 88 digital management for OA has not yet been evaluated. This knowledge may help to further  
33  
34 89 improve digital management options for OA and to facilitate the implementation of OA  
35  
36 90 guidelines in a wider community. Thus, the aim of this qualitative study was to investigate  
37  
38 91 the patients' experiences of using a digital management program for hip and knee OA.  
39  
40  
41  
42  
43  
44  
45  
46  
47  
48  
49

## 50 93 **METHOD**

### 51 94 **Patient and public involvement statement**

52 95 The Joint Academy treatment program for OA is based on the evidence-based BOA concept  
53  
54 96 [13]. In addition to the interviews in the present study, the digital platform has previously  
55  
56 97 been further developed and improved by analyzing questionnaires and opinions from  
57  
58  
59  
60

1  
2  
3 98 patients recruited via the Swedish Rheumatism Association. These patients were able to test  
4  
5 99 Joint Academy and were extensively interviewed about their opinions. All other aspects of  
6  
7  
8 100 this research were performed without patient involvement. Patients were not invited to  
9  
10 101 comment on the study design and were not consulted to develop patient-relevant outcomes  
11  
12  
13 102 or interpret the results. Patients were not invited to contribute to the writing or editing of  
14  
15 103 this document for readability or accuracy.  
16  
17  
18 104

### 19 20 105 **Setting and sampling**

21 106 This study was conducted at a regional hospital in the southern part of Sweden. From a total  
22  
23  
24 107 sample of 462 individuals that had completed six weeks in the digital OA management  
25  
26 108 program between 2015 and 2018, 73 invitations with written information about the study  
27  
28  
29 109 were sent out by e-mail by the first author (AC). The inclusion criterion was clinical hip or  
30  
31 110 knee OA, previously confirmed or diagnosed according to the ACR criteria [25, 26] by an  
32  
33  
34 111 orthopedic surgeon involved in the program. The exclusion criteria were i) reporting other  
35  
36 112 joints than hip or knee as the primary joint for OA symptoms, and ii) not understanding  
37  
38  
39 113 and/or speaking Swedish. The participants were purposefully selected in order to represent  
40  
41 114 both sexes, different age groups, perceived pain and physical function [27]. Twenty-one  
42  
43  
44 115 participants accepted the invitation to participate in this study. Two were excluded as one  
45  
46 116 did not speak Swedish and one did not return our phone calls. Ten women and nine men,  
47  
48  
49 117 median age 66 (q1-q3, 57-71) years were consecutively included in the study. Their primary  
50  
51 118 OA joint location was either in the knee (48%) or hip (52%) (See Table 1 for participant  
52  
53  
54 119 characteristics). All participants in this study completed the program via stationary  
55  
56 120 computers, laptops or mobile phones. The Regional Ethical Review Board in Lund, Sweden  
57  
58  
59  
60

1  
2  
3 121 (Dnr 2017/651; Dnr 2017/980) approved the study and all patients gave their written  
4  
5 122 informed consent prior to participation.  
6  
7  
8 123

## 11 124 **Data collection**

12 125 The interviews were conducted by two of the authors (JE, physical therapy student & AC,  
13  
14  
15 126 physical therapist and PhD), either as face-to-face interviews, by Skype or by telephone,  
16  
17  
18 127 depending on the participant's location and access to Skype. The semi-structured interview  
19  
20 128 guide included areas of interest such as 1) experiences of living with OA, 2) prior experiences  
21  
22  
23 129 of OA management, 3) experiences of the digital management program (e.g., set-up,  
24  
25 130 educational contents, feed-back, feed-forward, availability and design), and 4) experiences  
26  
27  
28 131 of factors that may have increased their motivation, persistence and emotional reactions. In  
29  
30 132 addition, the participants were asked to suggest possible improvements to the program.  
31  
32  
33 133 Follow-up questions were used to encourage the participants to elaborate on the subject  
34  
35 134 and to explain or clarify the meaning and consequences of their experiences. The interview  
36  
37  
38 135 guide and follow-up questions were pilot tested on three older individuals with OA, not  
39  
40 136 included in the study and was then subjected to minor editing. The two interviewers  
41  
42  
43 137 completed basic training in interview technique prior to data collection and had no relation  
44  
45 138 to the participants in this study. The interviews, which lasted approximately 30-40 minutes,  
46  
47  
48 139 were recorded and transcribed verbatim. Data collection stopped when no further  
49  
50 140 information was added, i.e., the interviews did not add any new information to the results.  
51  
52 141 See Appendix 1 for interview guide.  
53  
54  
55 142

## 143 **Data analysis**

144 The transcripts were analyzed using systematic text condensation (STC) according to  
145 Malterud [28], which is based on Giorgi's phenomenological analysis [29]. The procedure of  
146 the analysis consists of the following steps: 1) creating an overall impression and identifying  
147 themes; 2) distinguishing and sorting meaning units to codes; 3) formulating the meaning of  
148 each code meaning and 4) synthesizing the condensed meaning into descriptions and  
149 concepts (See Appendix 2 for examples). STC was chosen as the procedure facilitates cross-  
150 case synthesis of text and meaning [28]. Consequently, in the first step, the interview  
151 transcripts were read to get a general impression of the whole and to identify primary  
152 themes. Then, meaning units were identified and formulated into codes that represented  
153 the core of the statements. During this phase, three of the authors (JE, AC, and CSH) worked  
154 individually to identify as many perspectives and perceptions as possible in the material.  
155 Next, all authors worked together with the coded data to produce one set of data, extracting  
156 duplicates and data that were not relevant for the aim of the study. The coded data were  
157 then organized into subcategories, and the content of the meaning units of each category  
158 was re-examined. The meaning and representation of the data was formulated into aspects  
159 representing the content. Thereafter, the subcategories were organized into categories. To  
160 validate the categories and make sure that no important aspects had been overlooked, the  
161 clusters were referred back to the raw data, and read through once again by the authors.  
162 Finally, the re-contextualized data was expressed as interpretations of the meaning of each  
163 category and representative quotes were selected for each category/subcategory.

164

## 165 RESULT

166 Three main categories were uncovered during the analysis:

167 1) Management options for mitigating the consequences of OA,

168 2) Experiences of the digital program, with four sub-categories a) Easy to execute, b)

169 Flexibility to choose when and where, c) The importance of interacting with healthcare

170 professionals and d) Other motivating factors and 3) Perceived effects of the digital program

171 over time, with two subcategories a) Perceived effects of the program after the initial six

172 weeks and b) Reasons for continuing to participate in the program (Figure 1). Participants'

173 suggestions for improving the digital program were also analyzed.

174

### 175 **Management options for mitigating the consequences of OA**

176 This category entailed the experiences of the perceived consequences of OA leading to the

177 patients' eager search for a cure that would reduce their symptoms. All participants described

178 symptoms such as pain, disrupted sleep, deteriorating ability to walk, being immobile, and

179 activity limitations. Pain was the main motivation for seeking professional management. The

180 participants also found that their decreased functioning was not only affecting themselves,

181 but was also a burden on their partners and family. They were trying all sorts of ways to ease

182 the pain and to regain motor function. They were eager to try any treatment hoping that the

183 program could reduce their symptoms and improve their quality of life.

184

185 *"I felt that it was impossible to continue in this way as I was in such intense pain..." (I18)*

186

1  
2  
3 187 *"...you know...I wasn't able to go downtown without thinking about how I would get*  
4  
5  
6 188 *back home again, when it was at its worst. I was also considering having surgery and*  
7  
8 189 *other options, but only to get better. I was feeling really bad ..."* (I12)  
9

10  
11 190  
12  
13 191 *"You take every chance for improvement that you get. In the end you know it'll be*  
14  
15 192 *beneficial."* (I3)  
16

17  
18 193

## 19 194 **Experiences of the digital program**

20  
21 195 This category includes four sub-categories; a) Easy to execute, b) Flexibility to choose when  
22  
23  
24 196 and where, c) The importance of interacting with healthcare professionals and d) Other  
25  
26 197 motivating factors. In general, the participants' experiences of the program were positive.  
27  
28 198 They found the program very easy to execute, flexible, and motivational. The interaction  
29  
30 199 with the physical therapist was described as important for support and encouragement.  
31  
32  
33

34 200

### 35 36 37 201 *Easy to execute*

38  
39 202 Most participants were satisfied with the set-up of the program. The program was perceived  
40  
41 203 as structured, educational, and very simple to execute. Other elements that facilitated  
42  
43 204 participation were instructional videos, email reminders, and that the exercises were  
44  
45 205 individually customized with increasing difficulty, but also quickly accomplished.  
46  
47  
48

49 206  
50 207 *"This is such a great set-up. Not only the exercises, it's really educational and you*  
51  
52 208 *learn what osteoarthritis is really about."* (I13)  
53

54  
55 209

56  
57 210 *"I found it really easy to follow. It does not take long and it's really good to receive*  
58  
59 211 *these reminders by email"* (I18)  
60

1  
2  
3 212  
4  
5 213 However, a few participants perceived some difficulties in understanding how the program  
6  
7 214 worked. They found that the progression of the exercises was not clearly described or that it  
8  
9 215 was difficult to understand specific words used in the videos.

10  
11  
12 216  
13  
14  
15 217 *“To me it was hard to follow in the beginning and it actually took some time before*  
16  
17 218 *I understood it correctly. It took like a few weeks until I really got the system. And*  
18  
19 219 *that was a pity I think.” (I8)*

20  
21  
22 220  
23  
24  
25  
26 221 *Flexibility to choose when and where*  
27 222 All participants acknowledged the flexibility that was associated with this digital  
28  
29 223 management program. The ability to execute the exercises at home, or at any place at any  
30  
31 224 time, without any use of equipment was highly appreciated. The ability to control the time  
32  
33 225 point for when to perform the exercises and not having to make a scheduled appointment at  
34  
35 226 a specific location, were described as an advantage compared to traditional management,  
36  
37 227 and were further expressed as time-saving and less stressful since participants did not have  
38  
39 228 to take time off from work for OA management. One participant even expressed that she  
40  
41 229 would never have completed such a program if it had not been digital.

42  
43  
44 230  
45  
46  
47  
48  
49 231 *“The flexibility, that I could decide on my own when to perform the exercises was*  
50  
51 232 *really good. That I didn’t have any scheduled time point when I had to dress, go*  
52  
53 233 *out, and at this exact time point meet a physical therapist. That I could decide on*  
54  
55 234 *my own...” (I11)*

56  
57  
58  
59 235  
60



1  
2  
3 236 *"I don't think this is bad at all, to have it on the internet like this. I would never*  
4  
5  
6 237 *have done it if it hadn't been digital"* (I17)  
7

8 238  
9  
10 239 Some participants described that there were long waiting lists for traditional OA  
11  
12  
13 240 management in primary care and that the digital program was, thus, a flexible alternative  
14  
15 241 that they could start at once.  
16

17 242  
18 243 *"Yes, it was also like, there was such a long waiting list for primary care. So I*  
19  
20  
21 244 *thought...this...this I can start doing right away."* (I10)  
22  
23

24 245  
25  
26  
27 246 *The importance of interacting with healthcare professionals*  
28  
29 247 Receiving an OA diagnosis without any physical meeting was perceived as a bit awkward to  
30  
31 248 some participants. Some concerns were revealed regarding the risk of missing serious diseases  
32  
33  
34 249 if the diagnosis was given by phone or internet.  
35

36 250  
37  
38 251 *"It's somewhat hard to give a diagnosis over the phone. You can do it, but it's more*  
39  
40  
41 252 *difficult and you can miss things... there could have been a tumor there..."* (I14)  
42

43 253  
44  
45 254 The majority of the participants had a very positive experience of the interaction with their  
46  
47 255 online physical therapist. They described that they received fast responses to their  
48  
49  
50 256 questions, as well as information and encouragement, and that they often received feedback  
51  
52  
53 257 within a few hours. Some expressed that the engagement from their physical therapist was  
54  
55 258 valuable for support and encouragement, especially if they experienced pain during the  
56  
57 259 exercises. The daily contact with their physical therapist encouraged them to perform their  
58  
59  
60

1  
2  
3 260 exercises every day, which was also perceived as an advantage compared to traditional care  
4  
5  
6 261 management.

7  
8 262  
9  
10 263 *“I think it’s excellent to have daily contact. I think it’s outstanding. That puts*  
11  
12 264 *pressure on me to really do these exercises and to answer him [the physical*  
13  
14 265 *therapist] and to give him an opportunity to give feedback and information about*  
15  
16 266 *other things... You can’t go to a physical therapist every day, every day, every*  
17  
18 267 *day. That won’t work. They won’t have time for me, they have others to take care*  
19  
20 268 *of as well. “ (I12)*

21  
22  
23  
24  
25 269  
26  
27 270 In contrast, some participants experienced the contact with their online physical therapist to  
28  
29 271 be unsatisfactory or even non-existent. They described that it could take a week before they  
30  
31 272 received any response, that the questions were only partly answered, or that they received  
32  
33 273 no answer at all. Continuous follow-up with feedback and encouragement on their  
34  
35 274 performance in the program was also lacking.

36  
37  
38  
39 275  
40  
41 276 *“In the beginning they said that someone would get in touch with me on a regular*  
42  
43 277 *basis and things like that. But this hasn’t happened as I expected” (I9)*

44  
45  
46 278  
47  
48  
49 279 *Other motivating factors*

50 280 The daily email reminders were typically highlighted as a motivator since they ensured that  
51  
52 281 participants did not forget about the exercises and pushed them to perform the activities  
53  
54 282 every day. Improved OA symptoms, and the measurement feedback system provided by the  
55  
56  
57  
58  
59  
60

1  
2  
3 283 program were other factors that were mentioned as contributing to the participants'  
4  
5  
6 284 motivation to perform the exercises.

7  
8 285  
9 286 *"It was there, popped up in my email box every day. OK, today I'll do this*  
10  
11 287 *exercise...it was something that pushed me. That was good I think...I needed that."*

12  
13  
14 288 (18)

15  
16 289

### 20 290 **Perceived effects of the digital program over time**

21 291 This category includes two sub-categories; a) Perceived effects of the program after  
22  
23  
24 292 the initial six weeks and b) Reasons for continuing to participate in the program. The  
25  
26 293 majority of the participants reported improved functioning and reduced pain.

27  
28  
29 294 However, some people felt no improvements and that their symptoms were the same  
30  
31 295 as before entering the program. Many continued to participate in the program after  
32  
33  
34 296 the initial six weeks to maintain the positive improvements. Although the participants  
35  
36 297 were positive to the digital program, they suggested a broader variation of exercises  
37  
38  
39 298 as well as follow-ups by video calls.

40  
41 299

#### 44 300 *Perceived effects of the digital program after the initial six weeks*

45 301 Several participants experienced significant reductions in OA symptoms after completing the  
46  
47  
48 302 program. Improvements commonly mentioned were reduced pain, increased flexibility, and  
49  
50  
51 303 improved walking abilities. In many cases the symptoms were still present but were  
52  
53 304 perceived to have improved significantly, leading to increased quality of life and less focus  
54  
55  
56 305 on the disease. Many described that they had recommended the program to friends and

1  
2  
3 306 relatives suffering from hip or knee OA, since they were satisfied with the result and wished  
4  
5  
6 307 that more people could undergo the same management program.  
7

8 308  
9  
10 309 *“It has helped me fantastically. I don’t think I could have walked the way I do today*  
11  
12 310 *if I hadn’t done this... I don’t think so... I think this program has had an absolute*  
13  
14 311 *crucial role in the fact that I can manage my everyday life as well as I can now,*  
15  
16 312 *even though I have quite big problems.” (I2)*  
17

18 313  
19  
20 314  
21  
22 315 Not all participants perceived that they had reduced symptoms or improvements after six  
23  
24 316 weeks in the program. Some described that their symptoms were still the same or had  
25  
26 317 initially improved, and then worsened with deteriorating physical function and increased  
27  
28 318 pain. However, several of these participants still believed in the set-up despite not  
29  
30 319 experiencing the results they wished for. This lack of positive results was attributed to a  
31  
32 320 belief that they entered the program too late, i.e., that the exercises might have helped if  
33  
34 321 they had started at an earlier stage of the disease, or that the exercises may have slowed  
35  
36 322 down the disease progression.  
37  
38  
39  
40  
41  
42

43 323  
44  
45 324 *“The sad thing is that even if I do these exercises, every day, every week, every*  
46  
47 325 *month, every year... nothing happens... I don’t get any better.” (I4)*  
48  
49  
50

51 326  
52  
53 327 *“It felt really good in the beginning. The reason that it didn’t help me is probably*  
54  
55 328 *because I started too late.” (I12)*  
56  
57

58 329  
59 330  
60

1  
2  
3 331 *Reasons for continuing to participate in the program*

4 332  
5 333 Many continued to do their exercises after the six weeks evaluation. Perceived functional  
6  
7  
8 334 improvements and pain reduction as well as fear of the symptoms worsening were highly  
9  
10  
11 335 motivating factors for continuing to perform the exercises. Another reason was that it might  
12  
13 336 help them to be well prepared for any upcoming surgery.  
14  
15

16 337  
17  
18 338 *"I believe in these exercises. I believe that exercise is good for osteoarthritis. I am*  
19  
20 339 *convinced. And I think... if I stop doing this... then this terrible pain will start again."*  
21  
22  
23 340 (I8)

24  
25 341  
26  
27  
28 342 On the other hand, reduced pain and scheduled surgery were described by some  
29  
30 343 participants as reasons for not continuing the program.  
31  
32

33 344  
34  
35 345 *"The pain was generally reduced... and then I did not feel as motivated as before*  
36  
37 346 *so I quit doing the exercises... yes I did. Generally, in physical therapy, it's hard to*  
38  
39 347 *keep your motivation up if you don't have a lot of pain."* (I19)  
40  
41

42 348  
43  
44 349 *"I have met with my orthopedist and I'm scheduled for surgery... I feel that the end*  
45  
46 350 *of this problem is near. That's why I'm not performing the exercises as I should*  
47  
48 351 *anymore."* (I18)  
49  
50  
51  
52  
53  
54  
55  
56  
57  
58  
59  
60

1  
2  
3  
4 3525  
6 353 **Suggestions for improving the digital program**

7 354 The participants suggested a few possible improvements to the digital program. For  
8  
9  
10 355 example, many experienced that there were too few exercises with little variation, and the  
11  
12 356 exercises were perceived as somewhat monotonous after a while, especially if the  
13  
14  
15 357 participants were highly active in the program, i.e., carried out exercises several days a  
16  
17 358 week. It was suggested that varying and/or adding more exercises would increase  
18  
19  
20 359 motivation to perform them.

21  
22  
23 360 *“In the end it became a bit boring since there were so few movements... so I*  
24  
25 361 *added some extra on my own... It was a bit boring to do the same thing every*  
26  
27  
28 362 *day.” (I14)*

29  
30 363  
31  
32  
33 364 Some participants that were not satisfied with the communication with the  
34  
35 365 online physical therapist suggested improved patient-physical therapist  
36  
37 366 interaction using increased feedback and encouragement. Another suggestion  
38  
39  
40 367 included follow-ups video calls or Skype to enhance feedback on the individual  
41  
42 368 performance of specific exercises

43  
44  
45 369  
46  
47 370 *“You could send a video via internet and the physical therapist will then check that*  
48  
49 371 *you have performed the exercise and performed it correctly and correct you if you*  
50  
51 372 *have performed it incorrectly.” (I19)*

52  
53  
54  
55 37356  
57 374 **DISCUSSION**58  
59  
60

1  
2  
3 375 We sought to investigate participant experiences of a digital management program for hip  
4  
5 376 and knee OA. The majority of the participants reported improvements after the initial six  
6  
7  
8 377 weeks, such as reduced pain, increased mobility, and a sense of improved quality of life. In  
9  
10 378 general the participants found that the program was easy to execute. The flexibility of being  
11  
12  
13 379 able to perform the exercises anywhere and at any time point was highly appreciated. The  
14  
15 380 daily contact with the physical therapist was considered very important and an advantage  
16  
17 381 compared to traditional care and the participants felt that the support and encouragement  
18  
19 382 they received was important to continue exercising. In addition, the participants suggested  
20  
21  
22 383 more variation in the exercises and follow-up by video-calls.  
23  
24  
25 384

26  
27 385 Despite international guidelines [12], many patients with hip and knee OA do not receive  
28  
29 386 appropriate treatment and information regarding OA management options [4, 13, 14]. Web-  
30  
31  
32 387 based or digital management programs have been proposed as an option for facilitating the  
33  
34 388 implementation of non-surgical treatment as they have the potential to reach more  
35  
36  
37 389 individuals in need of OA treatment [4]. The participants in the current study were mostly  
38  
39 390 positive to the set-up of the program. Being able to perform the exercises whenever and  
40  
41  
42 391 wherever they desired, without needing to take time off from work, was described as  
43  
44 392 valuable. Several participants also mentioned that the digital program was something they  
45  
46  
47 393 could start doing right away instead of being put on a waiting list. They also experienced the  
48  
49 394 program to be educational and they felt motivated by the daily email reminders and the  
50  
51 395 feedback system that were provided by the program. This result is in line with previous  
52  
53 396 studies investigating patient perceptions of digital OA management, e.g., through internet or  
54  
55  
56 397 tele rehabilitation, where the participants experienced such programs to be convenient and  
57  
58  
59 398 time-saving [30, 31].  
60

1  
2  
3 399  
4  
5  
6 400 Exercise is one of the cornerstones of OA management [12]. However, the outcome of the  
7  
8 401 OA management program is highly dependent on adherence to the exercises. People with  
9  
10 402 OA is reported to be among those with particularly poor adherence to this type of treatment  
11  
12 403 [32], although there seem to be good adherence to treatment delivered online in these  
13  
14 404 patients [33]. A recent systematic review of people with hip and knee OA identified factors  
15  
16 405 such as increased knowledge of the disease and benefits of exercise, reduced symptoms,  
17  
18 406 easy access to training facilities, and the ability to fit the exercises into daily life as facilitating  
19  
20 407 exercise participation, whereas long travel time and parking difficulties were considered as  
21  
22 408 barriers [34]. The results from the current study indicate that a digital program may facilitate  
23  
24 409 participation in OA management programs and eliminate some of the barriers associated  
25  
26 410 with exercise participation, such as access and time constraints, and further highlights the  
27  
28 411 importance of adequate information and education regarding the benefits of exercise and  
29  
30 412 different treatment options in OA. There were, however, some contrasting experiences of  
31  
32 413 the digital program, mostly related to perceived symptom improvement and contact with  
33  
34 414 the physical therapist. Future quantitative investigations may reveal if such differences are  
35  
36 415 related to adherence, i.e., activity level in the program. Previous research conclude that  
37  
38 416 including behavioral change techniques may increase adherence to exercise [35] and a  
39  
40 417 digital delivery may enable the patients to continue their treatment week after week to  
41  
42 418 further improvements and to sustain their achieved behavioral change.  
43  
44  
45  
46  
47  
48  
49  
50  
51  
52  
53 419  
54 420 Previous research indicates that support and encouragement from healthcare staff are  
55  
56 421 important factors in facilitating exercise participation in people with hip and knee OA [34].  
57  
58 422 This was also reflected in the current study. Interaction with the physical therapist was  
59  
60



1  
2  
3 423 another important aspect that was highlighted by the participants. Most participants had a  
4  
5 424 positive experience of the contact with their assigned physical therapist and they were  
6  
7  
8 425 highly motivated by the daily contact and the support and encouragement that were  
9  
10 426 provided. This result further emphasizes previous findings that a strong therapeutic alliance  
11  
12  
13 427 can be established without meeting in person [36-38]. However, some participants were not  
14  
15 428 satisfied with the contact, which in turn lowered their motivation to perform the exercises.  
16  
17  
18 429 This may indicate that support and encouragement from the physical therapist are  
19  
20 430 prerequisites for a satisfactory experience of a digital OA management program.  
21

22  
23 431  
24  
25 432 In accordance with studies on tele rehabilitation, [30, 31], some concerns were expressed in  
26  
27 433 our interviews about being diagnosed online. A few patients were afraid that they may have  
28  
29 434 been suffering from a more serious disease, such as cancer, and that a differential diagnosis  
30  
31  
32 435 may be difficult via the internet. It is therefore important to respond to these worries  
33  
34  
35 436 accordingly, and provide the patients with information that explains that OA is primarily  
36  
37 437 diagnosed by symptoms and signs without any use of radiography or laboratory equipment  
38  
39 438 [39]. Also, some participants wished to have follow-ups via video call to eliminate the risk of  
40  
41  
42 439 performing the exercises incorrectly. This is consistent with previous studies reporting that  
43  
44  
45 440 non-supervised home-based exercises can give rise to concerns regarding the correct  
46  
47 441 performance of the exercises [5, 31, 40]. Video calls may, thus, be one way to develop the  
48  
49  
50 442 program further and to optimize the experiences of digital programs without any physical  
51  
52 443 meeting. However, the influence of video conversations needs further study.  
53

54 444  
55  
56  
57 445 The results confirmed the findings of previous studies, in that the participants reported that  
58  
59 446 the most important results of the program were improvements such as reduced pain,  
60

1  
2  
3 447 increased flexibility, and improved walking abilities [18, 19], which brought a sense of  
4  
5 448 improved quality of life and less focus on the disease. Interestingly, reduced pain and being  
6  
7 449 scheduled for surgery were two factors described as both facilitators and barriers to  
8  
9 450 continuing in the program. Some participants continued to exercise because they  
10  
11 451 experienced that the program had reduced their pain and they were afraid that the pain  
12  
13 452 would come back if they stopped doing the exercises. In contrast, some felt that reduced  
14  
15 453 pain was a reason to stop doing the exercises, as their motivation was lost when pain no  
16  
17 454 longer was an issue. Likewise, some participants continued to exercise since they wanted to  
18  
19 455 be ready and as fit as possible for a total joint replacement (TJR), whereas others quit doing  
20  
21 456 the exercises when they were scheduled for TJR as they believed the surgery would solve  
22  
23 457 their problems anyway. Pre-surgery exercise is known to improve outcomes such as length  
24  
25 458 of hospitalization, knee range of motion, and physical function after total knee replacements  
26  
27 459 [41] and such information is, therefore, important to include in the educational material to  
28  
29 460 facilitate recovery after any future TJRs in these patients.  
30  
31  
32  
33  
34  
35  
36  
37  
38

39 461  
40 462 One strength of this study is that the participants were purposefully selected, including both  
41  
42 463 men and women who differed in age, OA severity, physical function, and OA location (hip or  
43  
44 464 knee) from different parts of Sweden. However, since the participants were located all over  
45  
46 465 Sweden, the interviews were mostly conducted by telephone or via Skype. This approach  
47  
48 466 may have resulted in less depth of the interviews due to a loss of visual input. Also, two of  
49  
50 467 the participants completed the program more than one year prior to the interviews, which  
51  
52 468 may have influenced their recollection of the program and thereby also the experiences  
53  
54 469 expressed during the interviews. Another limitation may be that some demographic data of  
55  
56 470 the participants, such as education level, previous experience of using digital applications  
57  
58  
59  
60

1  
2  
3 471 and year of OA diagnosis were not recorded. This information may have increased the  
4  
5 472 generalizability of the results.  
6  
7

8 473  
9  
10 474 Throughout the data analysis reflexivity has been considered, i.e., we have been aware that  
11  
12 475 the pre-understanding that the authors may have as clinicians and researchers could affect  
13  
14 476 the data, if one is not fully aware of previous experiences [42]. All authors worked separately  
15  
16 477 during the data processing and there were continuous discussions during the analysis aimed  
17  
18 478 at eliminating possible influences of previous experiences, which helped us to stay neutral to  
19  
20 479 the data. In addition, we have also presented a signature after each quotation to show the  
21  
22 480 representation of our participants, and to add transparency and trustworthiness to our  
23  
24 481 findings and interpretations of the data.  
25  
26  
27  
28  
29  
30

## 31 482 CONCLUSION

32  
33 483 A digital management program for OA, including education and exercise as well as an option  
34  
35 484 to chat with an assigned physical therapist for feedback, questions and engagement, may be  
36  
37 485 an alternative to traditional treatment and further facilitate the implementation of OA  
38  
39 486 guidelines in a wider community. The participants had mostly positive experiences of the  
40  
41 487 program, the flexibility of the program with regards to location and time. Regular and  
42  
43 488 frequent contact with a physical therapist was deemed particularly important for a positive  
44  
45 489 experience of the program and was also emphasized as an advantage compared to  
46  
47 490 traditional care. In addition, the result of this study will contribute to the further  
48  
49 491 development and improvement of digital management for OA.  
50  
51  
52  
53  
54

55 492  
56  
57  
58  
59  
60

## 493 **AUTHORS' CONTRIBUTION**

494 Anna Cronström, PhD contributed to the design of the study, conducted part of the  
495 interviews, was responsible for the analysis and interpretation of the data, and was in charge  
496 of writing the manuscript. Leif E Dahlberg, PhD contributed to the conception and design of  
497 the study, contributed to the interpretation of the data, and provided feedback on drafts of  
498 this paper. Håkan Nero, PhD contributed to the conception and design of the study,  
499 contributed to the analysis and interpretation of the data, and provided feedback on drafts  
500 of this paper. Jennifer Ericson, BSc student contributed to the conception and design of the  
501 study, conducted part of the interviews, contributed to the analysis and interpretation of the  
502 data, and provided feedback on drafts of this paper. Catharina Sjö Dahl Hammarlund, PhD  
503 contributed to the conception and design of the study, contributed to the analysis and  
504 interpretation of the data, and provided feedback on drafts of this paper. All authors have  
505 read and approved the final manuscript.

506

## 507 **FUNDING**

508 This research was funded by Vinnova, Sweden's Innovation Agency, by Governmental  
509 Funding of Clinical Research within the National Health Service (ALF), the Faculty of  
510 Medicine, Lund University and by Region Skåne.

511

## 512 **COMPETING INTEREST**

513 HN is a physical therapist and part-time consultant at Joint Academy and LED is the co-  
514 founder and Chief Medical Officer in the corporation behind the same program. No other  
515 relationships or activities exist that could appear to have influenced the submitted work.

516

1  
2  
3  
4  
5  
6  
7  
8  
9  
10  
11  
12  
13  
14  
15  
16  
17  
18  
19  
20  
21  
22  
23  
24  
25  
26  
27  
28  
29  
30  
31  
32  
33  
34  
35  
36  
37  
38  
39  
40  
41  
42  
43  
44  
45  
46  
47  
48  
49  
50  
51  
52  
53  
54  
55  
56  
57  
58  
59  
60

517 **DATA SHARING STATEMENT**

518 The datasets used and/or analyzed during the current study are available from the  
519 corresponding author on reasonable request.

For peer review only

1  
2  
3  
4 520 **EXCLUSIVE LICENSE STATEMENT**

5  
6 521 I, the Submitting Author has the right to grant and does grant on behalf of all authors of the  
7  
8 522 Work (as defined in the below author licence), an exclusive licence and/or a non-exclusive  
9  
10 523 licence for contributions from authors who are: i) UK Crown employees; ii) where BMJ has  
11  
12 524 agreed a CC-BY licence shall apply, and/or iii) in accordance with the terms applicable for US  
13  
14 525 Federal Government officers or employees acting as part of their official duties; on a  
15  
16 526 worldwide, perpetual, irrevocable, royalty-free basis to BMJ Publishing Group Ltd ("BMJ") its  
17  
18 527 licensees and where the relevant Journal is co-owned by BMJ to the co-owners of the  
19  
20 528 Journal, to publish the Work in BMJ Open and any other BMJ products and to exploit all  
21  
22 529 rights, as set out in our licence.

23  
24  
25  
26  
27  
28 530

29  
30 531 The Submitting Author accepts and understands that any supply made under these terms is  
31  
32 532 made by BMJ to the Submitting Author unless you are acting as an employee on behalf of  
33  
34 533 your employer or a postgraduate student of an affiliated institution which is paying any  
35  
36 534 applicable article publishing charge ("APC") for Open Access articles. Where the Submitting  
37  
38 535 Author wishes to make the Work available on an Open Access basis (and intends to pay the  
39  
40 536 relevant APC), the terms of reuse of such Open Access shall be governed by a Creative  
41  
42 537 Commons licence – details of these licences and which Creative Commons licence will apply  
43  
44 538 to this Work are set out in our licence referred to above.

45  
46  
47  
48  
49  
50 539

51  
52 540  
53  
54  
55  
56  
57  
58  
59  
60

## 541 REFERENCES

- 542
- 543 1. Olthuis JV, Watt MC, Bailey K, Hayden JA, Stewart SH: **Therapist-supported Internet**
- 544 **cognitive behavioural therapy for anxiety disorders in adults.** *The Cochrane database of*
- 545 *systematic reviews* 2016, **3**:Cd011565.
- 546 2. van Beugen S, Ferwerda M, Hoeve D, Rovers MM, Spillekom-van Koulil S, van Middendorp H,
- 547 Evers AW: **Internet-based cognitive behavioral therapy for patients with chronic somatic**
- 548 **conditions: a meta-analytic review.** *Journal of medical Internet research* 2014, **16**(3):e88.
- 549 3. Booger EA, Noordam C, Kremer JA, Prins JB, Verhaak CM: **Teaming up: feasibility of an**
- 550 **online treatment environment for adolescents with type 1 diabetes.** *Pediatric diabetes*
- 551 *2014, 15*(5):394-402.
- 552 4. Li LC, Cott C, Jones CA, Badley EM, Davis AM: **Improving Primary Health Care in Chronic**
- 553 **Musculoskeletal Conditions through Digital Media: The PEOPLE Meeting.** *JMIR research*
- 554 *protocols* 2013, **2**(1):e13.
- 555 5. Bjork AB, Sjostrom M, Johansson EE, Samuelsson E, Umefjord G: **Women's experiences of**
- 556 **internet-based or postal treatment for stress urinary incontinence.** *Qualitative health*
- 557 *research* 2014, **24**(4):484-493.
- 558 6. Verhoeks C, Teunissen D, van der Stelt-Steenbergen A, Lagro-Janssen A: **Women's**
- 559 **expectations and experiences regarding e-health treatment: A systematic review.** *Health*
- 560 *informatics journal* 2017:1460458217720394.
- 561 7. Bidmon S, Terlutter R: **Gender Differences in Searching for Health Information on the**
- 562 **Internet and the Virtual Patient-Physician Relationship in Germany: Exploratory Results on**
- 563 **How Men and Women Differ and Why.** *Journal of medical Internet research* 2015,
- 564 **17**(6):e156.
- 565 8. Powell J, Inglis N, Ronnie J, Large S: **The characteristics and motivations of online health**
- 566 **information seekers: cross-sectional survey and qualitative interview study.** *Journal of*
- 567 *medical Internet research* 2011, **13**(1):e20.
- 568 9. Sanchez-Ortiz VC, House J, Munro C, Treasure J, Startup H, Williams C, Schmidt U: **"A**
- 569 **computer isn't gonna judge you": a qualitative study of users' views of an internet-based**
- 570 **cognitive behavioural guided self-care treatment package for bulimia nervosa and related**
- 571 **disorders.** *Eating and weight disorders : EWD* 2011, **16**(2):e93-e101.
- 572 10. Roettl J, Bidmon S, Terlutter R: **What Predicts Patients' Willingness to Undergo Online**
- 573 **Treatment and Pay for Online Treatment? Results from a Web-Based Survey to Investigate**
- 574 **the Changing Patient-Physician Relationship.** *Journal of medical Internet research* 2016,
- 575 **18**(2):e32.
- 576 11. Pietrzak E, Cotea C, Pullman S, Nasveld P: **Self-management and rehabilitation in**
- 577 **osteoarthritis: is there a place for internet-based interventions?** *Telemedicine journal and e-*
- 578 *health : the official journal of the American Telemedicine Association* 2013, **19**(10):800-805.
- 579 12. Jevsevar DS: **Treatment of osteoarthritis of the knee: evidence-based guideline, 2nd**
- 580 **edition.** *The Journal of the American Academy of Orthopaedic Surgeons* 2013, **21**(9):571-576.
- 581 13. Thorstensson CA, Garellick G, Rystedt H, Dahlberg LE: **Better Management of Patients with**
- 582 **Osteoarthritis: Development and Nationwide Implementation of an Evidence-Based**
- 583 **Supported Osteoarthritis Self-Management Programme.** *Musculoskeletal care* 2015,
- 584 **13**(2):67-75.
- 585 14. Li LC, Sayre EC, Kopec JA, Esdaile JM, Bar S, Cibere J: **Quality of nonpharmacological care in**
- 586 **the community for people with knee and hip osteoarthritis.** *The Journal of rheumatology*
- 587 *2011, 38*(10):2230-2237.
- 588 15. Bossen D, Veenhof C, Van Beek KE, Spreeuwenberg PM, Dekker J, De Bakker DH:
- 589 **Effectiveness of a web-based physical activity intervention in patients with knee and/or hip**

- 1  
2  
3 590 **osteoarthritis: randomized controlled trial.** *Journal of medical Internet research* 2013,  
4 591 **15(11):e257.**
- 5 592 16. Griffiths AJ, White CM, Thain PK, Bearne LM: **The effect of interactive digital interventions**  
6 593 **on physical activity in people with inflammatory arthritis: a systematic review.**  
7 594 *Rheumatology international* 2018, **38(9):1623-1634.**
- 8 595 17. Berry A, McCabe CS, Muir S, Walsh N: **Digital behaviour change interventions to facilitate**  
9 596 **physical activity in osteoarthritis: a systematic review.** *Physical Therapy Reviews* 2018,  
10 597 **23(3):197-206.**
- 11 598 18. Nero H, Dahlberg J, Dahlberg LE: **A 6-Week Web-Based Osteoarthritis Treatment Program:**  
12 599 **Observational Quasi-Experimental Study.** *Journal of medical Internet research* 2017,  
13 600 **19(12):e422.**
- 14 601 19. Dahlberg LE, Grahn D, Dahlberg JE, Thorstensson CA: **A Web-Based Platform for Patients**  
15 602 **With Osteoarthritis of the Hip and Knee: A Pilot Study.** *JMIR research protocols* 2016,  
16 603 **5(2):e115.**
- 17 604 20. Smittenaar P, Erhart-Hledik JC, Kinsella R, Hunter S, Mecklenburg G, Perez D: **Translating**  
18 605 **Comprehensive Conservative Care for Chronic Knee Pain Into a Digital Care Pathway: 12-**  
19 606 **Week and 6-Month Outcomes for the Hinge Health Program.** *JMIR rehabilitation and*  
20 607 *assistive technologies* 2017, **4(1):e4.**
- 21 608 21. **Joint Academy** [<https://www.jointacademy.com/se/en/>]
- 22 609 22. Nero H, Dahlberg JE, Dahlberg LE: **Joint academy - a six-week online treatment program for**  
23 610 **osteoarthritis.** In: *Osteoarthritis Research Society International (OARSI)*. Liverpool, England:  
24 611 Osteoarthritis and Cartilage; 2018.
- 25 612 23. Jonsson T, Ekvall Hansson E, Thorstensson CA, Eek F, Bergman P, Dahlberg LE: **The effect of**  
26 613 **education and supervised exercise on physical activity, pain, quality of life and self-efficacy**  
27 614 **- an intervention study with a reference group.** *BMC musculoskeletal disorders* 2018,  
28 615 **19(1):198.**
- 29 616 24. Cronstrom A, Nero H, Dahlberg LE: **Factors associated with patients' willingness to consider**  
30 617 **joint surgery after completion of a digital osteoarthritis treatment program: A prospective**  
31 618 **cohort study.** *Arthritis care & research* 2018.
- 32 619 25. Altman R, Alarcon G, Appelrouth D, Bloch D, Borenstein D, Brandt K, Brown C, Cooke TD,  
33 620 Daniel W, Feldman D *et al*: **The American College of Rheumatology criteria for the**  
34 621 **classification and reporting of osteoarthritis of the hip.** *Arthritis and rheumatism* 1991,  
35 622 **34(5):505-514.**
- 36 623 26. Altman R, Asch E, Bloch D, Bole G, Borenstein D, Brandt K, Christy W, Cooke TD, Greenwald R,  
37 624 Hochberg M *et al*: **Development of criteria for the classification and reporting of**  
38 625 **osteoarthritis. Classification of osteoarthritis of the knee. Diagnostic and Therapeutic**  
39 626 **Criteria Committee of the American Rheumatism Association.** *Arthritis and rheumatism*  
40 627 1986, **29(8):1039-1049.**
- 41 628 27. Patton M: **Qualitative evaluation and research methods**, 3rd edn. Thousand Oaks, CA: Sage  
42 629 Publications, Inc; 2002.
- 43 630 28. Malterud K: **Systematic text condensation: a strategy for qualitative analysis.** *Scandinavian*  
44 631 *journal of public health* 2012, **40(8):795-805.**
- 45 632 29. Giorgi A: **Phenomenology and psychological research.** Pittsburgh, PA: Duquesne University  
46 633 Press; 1985.
- 47 634 30. Lawford BJ, Bennell KL, Hinman RS: **Consumer Perceptions of and Willingness to Use**  
48 635 **Remotely Delivered Service Models For Exercise Management of Knee and Hip**  
49 636 **Osteoarthritis: A Cross-Sectional Survey.** *Arthritis care & research* 2017, **69(5):667-676.**
- 50 637 31. Lawford BJ, Delany C, Bennell KL, Hinman RS: **"I was really sceptical...But it worked really**  
51 638 **well": a qualitative study of patient perceptions of telephone-delivered exercise therapy by**  
52 639 **physiotherapists for people with knee osteoarthritis.** *Osteoarthritis and cartilage / OARS,*  
53 640 *Osteoarthritis Research Society* 2018, **26(6):741-750.**



- 1  
2  
3 641 32. Pisters MF, Veenhof C, Schellevis FG, Twisk JW, Dekker J, De Bakker DH: **Exercise adherence improving long-term patient outcome in patients with osteoarthritis of the hip and/or knee.** *Arthritis care & research* 2010, **62**(8):1087-1094.
- 4 642  
5 643  
6 644 33. de Vries HJ, Kloek CJJ, de Bakker DH, Dekker J, Bossen D, Veenhof C: **Determinants of Adherence to the Online Component of a Blended Intervention for Patients with Hip and/or Knee Osteoarthritis: A Mixed Methods Study Embedded in the e-Exercise Trial.** *Telemedicine journal and e-health : the official journal of the American Telemedicine Association* 2017, **23**(12):1002-1010.
- 7 645  
8 646  
9 647  
10 648  
11 649 34. Dobson F, Bennell KL, French SD, Nicolson PJ, Klaasman RN, Holden MA, Atkins L, Hinman RS: **Barriers and Facilitators to Exercise Participation in People with Hip and/or Knee Osteoarthritis: Synthesis of the Literature Using Behavior Change Theory.** *American journal of physical medicine & rehabilitation* 2016, **95**(5):372-389.
- 12 650  
13 651  
14 652  
15 653 35. Meade LB, Bearne LM, Sweeney LH, Alageel SH, Godfrey EL: **Behaviour change techniques associated with adherence to prescribed exercise in patients with persistent musculoskeletal pain: Systematic review.** *British journal of health psychology* 2019, **24**(1):10-30.
- 16 654  
17 655  
18 656  
19 657 36. Lingely-Pottie P, McGrath PJ: **A therapeutic alliance can exist without face-to-face contact.** *Journal of telemedicine and telecare* 2006, **12**(8):396-399.
- 20 658  
21 659 37. Knaevelsrud C, Maercker A: **Internet-based treatment for PTSD reduces distress and facilitates the development of a strong therapeutic alliance: a randomized controlled clinical trial.** *BMC psychiatry* 2007, **7**:13.
- 22 660  
23 661  
24 662 38. Muller I, Kirby S, Yardley L: **The therapeutic relationship in telephone-delivered support for people undertaking rehabilitation: a mixed-methods interaction analysis.** *Disabil Rehabil* 2015, **37**(12):1060-1065.
- 25 663  
26 664  
27 665 39. Abhishek A, Doherty M: **Diagnosis and clinical presentation of osteoarthritis.** *Rheumatic diseases clinics of North America* 2013, **39**(1):45-66.
- 28 666  
29 667 40. Cranen K, Drossaert CH, Brinkman ES, Braakman-Jansen AL, Ijzerman MJ, Vollenbroek-Hutten MM: **An exploration of chronic pain patients' perceptions of home telerehabilitation services.** *Health expectations : an international journal of public participation in health care and health policy* 2012, **15**(4):339-350.
- 30 668  
31 669  
32 670  
33 671 41. Chen H, Li S, Ruan T, Liu L, Fang L: **Is it necessary to perform prehabilitation exercise for patients undergoing total knee arthroplasty: meta-analysis of randomized controlled trials.** *The Physician and sportsmedicine* 2018, **46**(1):36-43.
- 34 672  
35 673  
36 674 42. Malterud K: **Qualitative research: standards, challenges, and guidelines.** *Lancet (London, England)* 2001, **358**(9280):483-488.
- 37 675  
38 676  
39  
40  
41  
42  
43  
44  
45  
46  
47  
48  
49  
50  
51  
52  
53  
54  
55  
56  
57  
58  
59  
60

678 **Table 1.** Characteristics of the participants

| 679 | Characteristics                          | n=19             |
|-----|------------------------------------------|------------------|
| 680 | Age mean (min-max)                       | 65 (45-80)       |
| 681 | Sex                                      |                  |
| 682 | Women n                                  | 10               |
| 683 | Men n                                    | 9                |
| 684 | Retired n                                | 10               |
| 685 | OA location                              |                  |
| 686 | Hip n                                    | 10               |
| 687 | Knee n                                   | 9                |
|     | Pain baseline (min-max)                  | 6.1 (1-9)        |
|     | Physical function baseline (min-max)     | 8.6 (1-14)       |
|     | EQ5D-3L index baseline (min-max)         | 0.59 (0.29-0.76) |
|     | Activity in the program mean % (min-max) | 80.7 (19-93)     |

688 OA=osteoarthritis, pain was assessed with the Numeric Rating Scale (NRS) from 0-10, where  
 689 0 indicate no pain with higher numbers indicating more severe pain, physical function was  
 690 assessed using the 30-second Chair Stand Test reflecting the number of repetitions of sitting  
 691 to standing from a chair during a period of 30 seconds. EQ5D-3L= EuroQol – 5 dimension  
 692 descriptive system assessing health-related quality of life - a higher EQ-5D-3L index indicates  
 693 better health-related quality of life. Activity level was defined as the proportion of  
 694 completed videos, exercises and questionnaires offered in the program.

695

1  
2  
3  
4  
5  
6  
7  
8  
9  
10  
11  
12  
13  
14  
15  
16  
17  
18  
19  
20  
21  
22  
23  
24  
25  
26  
27  
28  
29  
30  
31  
32  
33  
34  
35  
36  
37  
38  
39  
40  
41  
42  
43  
44  
45  
46  
47  
48  
49  
50  
51  
52  
53  
54  
55  
56  
57  
58  
59  
60

696 **Figure 1.** Overview of the categories and subcategories describing the participants' experiences of  
697 the digital  
698

For peer review only

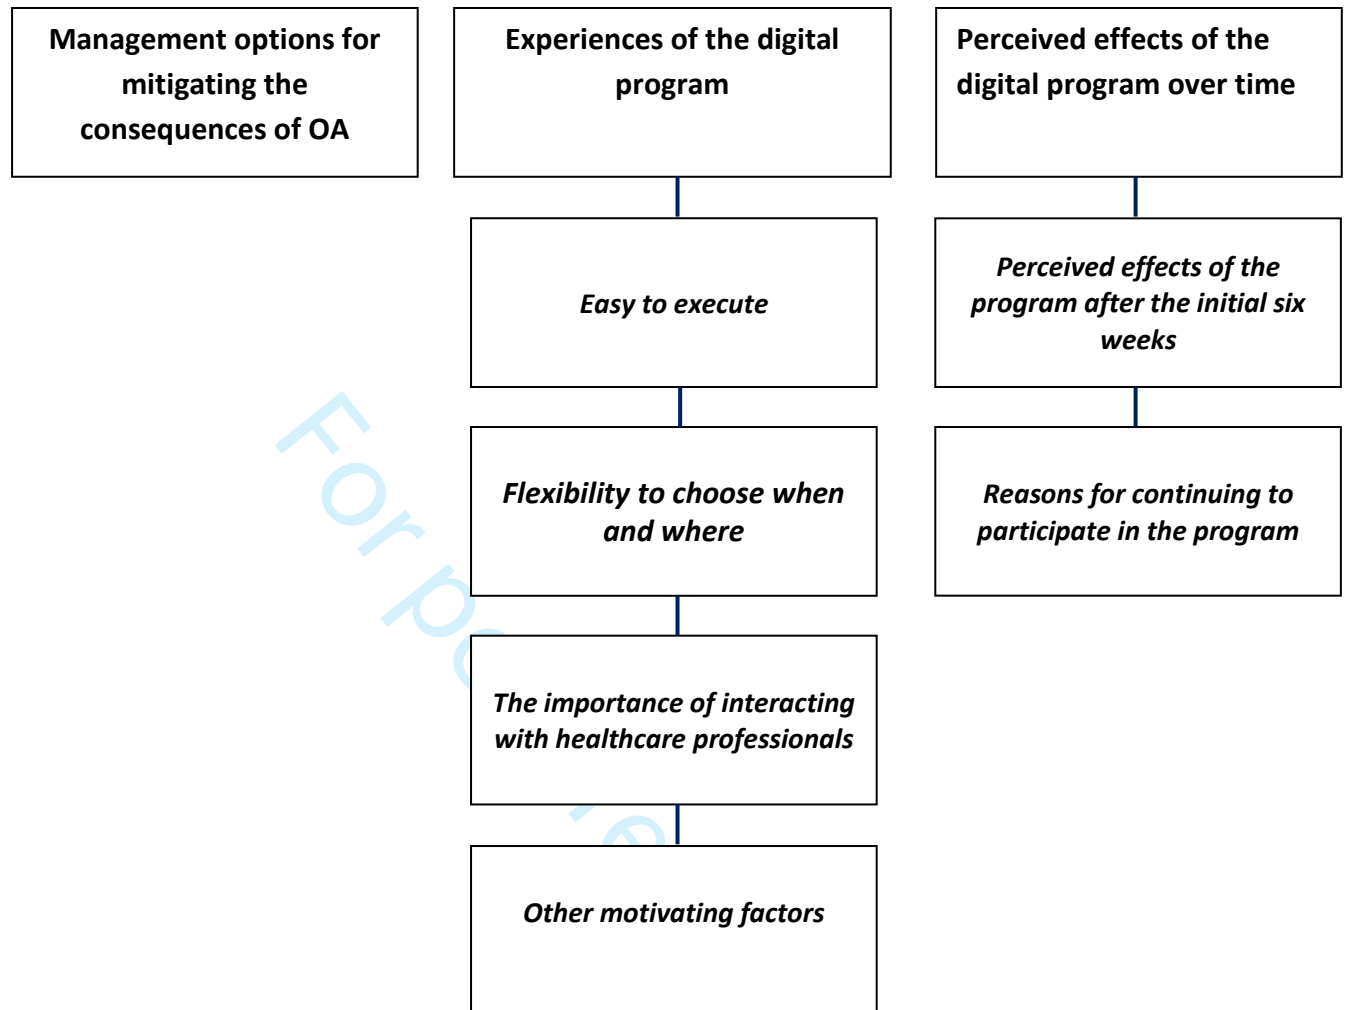

**Figure 1.** Overview of the categories and subcategories describing the participants' experiences of the digital management program for osteoarthritis

1  
2  
3 **Appendix 1. Interview guide - Experiences of a digital management program for hip and**  
4 **knee osteoarthritis** (translated from the Swedish version)  
5  
6  
7

8 How long have you had symptoms from your hip/knee?  
9

10 Could you describe your symptoms before joining the program?  
11

- 12
- 13 • How did your symptoms affect you everyday life?

14 What were your reasons for joining the program?  
15

16 What were your expectations before joining the program?  
17

18 How did you experience the treatment?  
19

- 20
- 21 • Set-up
  - 22 • Exercises
  - 23 • Availability
  - 24 • Layout
- 25

26 How was your motivation for doing the activities?  
27

28 How did you experience your contact with the physical therapist?  
29

30 Do you experience that the treatment has altered your symptoms?  
31

- 32
- 33 • In what way/direction?

34 Have you continued with the program/home exercises after the initial six weeks?  
35

- 36
- 37 • What were your reasons/motivations for continue/not continue?
- 38

39 How do you think Joint Academy could have done a better job in assisting your treatment?  
40  
41  
42  
43

44 At the end of the interview asking the participant to raise any subject not yet covered  
45

46 Throughout the interview the participants were asked to elaborate on the subject and to  
47 explain or clarify the meaning and consequences of their experiences  
48  
49  
50  
51  
52  
53  
54  
55  
56  
57  
58  
59  
60

## Appendix 2

**Table 1.** Examples of themes, meaning units, condensation of meaning units, codes and descriptions and concepts.

| Interview and page | Themes               | Meaning units                                                                                             | Condensed meaning unit | Code                                                  | Descriptions and concepts                          |
|--------------------|----------------------|-----------------------------------------------------------------------------------------------------------|------------------------|-------------------------------------------------------|----------------------------------------------------|
| 2B3                | Motivation           | I wanted to continue because I know it's good for me. And I know deep inside that exercises will help me. | I know it will help me | Motivated by improvements                             | Other motivating factors                           |
| 3c9                | Flexibility          | I had access 24/7. I could do it when it fitted me.                                                       | When it fitted me      | Could do the exercises when it fitted the participant | Flexibility to choose when and where               |
| 10J4               | Change in OA symptom | Yes, the pain was reduced and almost disappeared some days. I really improved so it was all positive      | Reduced pain           | The program reduced the OA symptoms                   | Perceived effects of the digital program over time |

## COREQ (CONsolidated criteria for REporting Qualitative research) Checklist

A checklist of items that should be included in reports of qualitative research. You must report the page number in your manuscript where you consider each of the items listed in this checklist. If you have not included this information, either revise your manuscript accordingly before submitting or note N/A.

| Topic                                          | Item No. | Guide Questions/Description                                                                                                                                   | Reported on Page No. |
|------------------------------------------------|----------|---------------------------------------------------------------------------------------------------------------------------------------------------------------|----------------------|
| <b>Domain 1: Research team and reflexivity</b> |          |                                                                                                                                                               | NA                   |
| <i>Personal characteristics</i>                |          |                                                                                                                                                               |                      |
| Interviewer/facilitator                        | 1        | JE & AC                                                                                                                                                       | 7 & 22               |
| Credentials                                    | 2        | JE:BSc student, AC: PhD                                                                                                                                       | 22                   |
| Occupation                                     | 3        | JE:Physiotherapy student, AC: Researcher                                                                                                                      | 22                   |
| Gender                                         | 4        | JE & AC: Female                                                                                                                                               |                      |
| Experience and training                        | 5        | Basic training                                                                                                                                                | 7                    |
| <i>Relationship with participants</i>          |          |                                                                                                                                                               |                      |
| Relationship established                       | 6        | No relationship                                                                                                                                               | NA                   |
| Participant knowledge of the interviewer       | 7        | All participants had oral and written information which included that the data collection was part of her Bachelor thesis and future scientific publications. | 6-7                  |
| Interviewer characteristics                    | 8        | JE & AC showed interest and empathy and gave relevant follow-up questions to encourage the participants to elaborate on their narratives.                     |                      |
| <b>Domain 2: Study design</b>                  |          |                                                                                                                                                               |                      |
| <i>Theoretical framework</i>                   |          |                                                                                                                                                               |                      |
| Methodological orientation and Theory          | 9        | Systematic text condensation as described by Malterud, which is based on Giorgis' psychological phenomenological analysis (ref 21,22)                         | 8                    |
| <i>Participant selection</i>                   |          |                                                                                                                                                               |                      |
| Sampling                                       | 10       | The participants were purposefully selected .....different age groups, perceived pain and physical function They were consecutively included...               | 6-7                  |
| Method of approach                             | 11       | Seventy three invitations with written information about the study were sent out by e-mail. Twenty-one accepted the invitation.                               | 6                    |
| Sample size                                    | 12       | Nineteen participated...                                                                                                                                      | 7                    |
| Non-participation                              | 13       | Two were excluded. One did not speak Swedish, one could not be reached.                                                                                       | 7                    |
| <i>Setting</i>                                 |          |                                                                                                                                                               |                      |
| Setting of data collection                     | 14       | Mostly in their homes using Skype or telephone, two personal interviews                                                                                       | 7                    |
| Presence of non-participants                   | 15       | None else were present besides the participants and researchers.                                                                                              | NA                   |
| Description of sample                          | 16       | Ten women and nine men, median age 66 (q1-q3, 57-71) years, OA joint location was either in the knee (48%) or hip (52%).                                      | 7                    |
| <i>Data collection</i>                         |          |                                                                                                                                                               |                      |
| Interview guide                                | 17       | The interview guide and follow-up questions were pilot tested and were then subjected to minor editing.                                                       | 7                    |
| Repeat interviews                              | 18       | No repeat interviews were carried out                                                                                                                         | NA                   |
| Audio/visual recording                         | 19       | The interviews were recorded.                                                                                                                                 | 8                    |
| Field notes                                    | 20       | Field notes was taken with regard to emotinal reactions and so on.                                                                                            |                      |
| Duration                                       | 21       | The duration was approximately 30-40 minutes.                                                                                                                 | 8                    |
| Data saturation                                | 22       | Data collection stopped when no further information was added.                                                                                                | 8                    |
| Transcripts returned                           | 23       | The transcripts were not returned to participants for comment and/or                                                                                          | NA                   |

| Topic                                  | Item No. | Guide Questions/Description                                                                                         | Reported on Page No. |
|----------------------------------------|----------|---------------------------------------------------------------------------------------------------------------------|----------------------|
|                                        |          | correction.                                                                                                         |                      |
| <b>Domain 3: analysis and findings</b> |          |                                                                                                                     |                      |
| <i>Data analysis</i>                   |          |                                                                                                                     |                      |
| Number of data coders                  | 24       | Three authors coded the data (JE,AC,CSH)                                                                            | 8                    |
| Description of the coding tree         | 25       | The coding tree was not provided.                                                                                   | NA                   |
| Derivation of themes                   | 26       | The themes derived from the data.                                                                                   | 8                    |
| Software                               | 27       | No software was used to manage the data.                                                                            | NA                   |
| Participant checking                   | 28       | The participants did not provide feedback on the findings.                                                          | NA                   |
| <i>Reporting</i>                       |          |                                                                                                                     |                      |
| Quotations presented                   | 29       | Participant quotations was presented to illustrate the findings and each quotation was identified with a signature. | 21                   |
| Data and findings consistent           | 30       | The data was rich, varied and consistent. No triangulation was done.                                                | 21                   |
| Clarity of major themes                | 31       | Major themes were clearly presented in the findings.                                                                | 8-17                 |
| Clarity of minor themes                | 32       | There is a description of diverse cases and discussion of minor themes.                                             | 18-21                |

Developed from: Tong A, Sainsbury P, Craig J. Consolidated criteria for reporting qualitative research (COREQ): a 32-item checklist for interviews and focus groups. *International Journal for Quality in Health Care*. 2007. Volume 19, Number 6: pp. 349 – 357

**Once you have completed this checklist, please save a copy and upload it as part of your submission. DO NOT include this checklist as part of the main manuscript document. It must be uploaded as a separate file.**
