# Supplementary material for: ‘I would never have done it if it hadn’t been digital’: a qualitative study on patients’ experiences of a digital management programme for hip and knee osteoarthritis in Sweden
Source: PubMed Central journal article supplement — BMJ Open. 2019 May 24;9(5):e028388. doi: 10.1136/bmjopen-2018-028388 (PMC6537991; doi:10.1136/bmjopen-2018-028388), 2019-05-24
Supplement: bmjopen-2018-028388supp001.pdf [file bmjopen-2018-028388supp001.pdf]

**Appendix 1. Interview guide - Experiences of a digital management program for hip and knee osteoarthritis** (translated from the Swedish version)

How long have you had symptoms from your hip/knee?

Could you describe your symptoms before joining the program?

- How did your symptoms affect you everyday life?

What were your reasons for joining the program?

What were your expectations before joining the program?

How did you experience the treatment?

- Set-up
- Exercises
- Availability
- Layout

How was your motivation for doing the activities?

How did you experience your contact with the physical therapist?

Do you experience that the treatment has altered your symptoms?

- In what way/direction?

Have you continued with the program/home exercises after the initial six weeks?

- What were your reasons/motivations for continue/not continue?

How do you think Joint Academy could have done a better job in assisting your treatment?

At the end of the interview asking the participant to raise any subject not yet covered

Throughout the interview the participants were asked to elaborate on the subject and to explain or clarify the meaning and consequences of their experiences
