# Supplementary material for: ‘I would never have done it if it hadn’t been digital’: a qualitative study on patients’ experiences of a digital management programme for hip and knee osteoarthritis in Sweden
Source: PubMed Central journal article supplement — BMJ Open. 2019 May 24;9(5):e028388. doi: 10.1136/bmjopen-2018-028388 (PMC6537991; doi:10.1136/bmjopen-2018-028388), 2019-05-24
Supplement: bmjopen-2018-028388supp002.pdf [file bmjopen-2018-028388supp002.pdf]

## Appendix 2

**Table 1.** Examples of themes, meaning units, condensation of meaning units, codes and descriptions and concepts.

| <b>Interview and page</b> | <b>Themes</b>        | <b>Meaning units</b>                                                                                      | <b>Condensed meaning unit</b> | <b>Code</b>                                           | <b>Descriptions and concepts</b>                   |
|---------------------------|----------------------|-----------------------------------------------------------------------------------------------------------|-------------------------------|-------------------------------------------------------|----------------------------------------------------|
|                           |                      |                                                                                                           |                               |                                                       |                                                    |
| 2B3                       | Motivation           | I wanted to continue because I know it's good for me. And I know deep inside that exercises will help me. | I know it will help me        | Motivated by improvements                             | Other motivating factors                           |
| 3c9                       | Flexibility          | I had access 24/7. I could do it when it fitted me.                                                       | When it fitted me             | Could do the exercises when it fitted the participant | Flexibility to choose when and where               |
| 10J4                      | Change in OA symptom | Yes, the pain was reduced and almost disappeared some days. I really improved so it was all positive      | Reduced pain                  | The program reduced the OA symptoms                   | Perceived effects of the digital program over time |
